# Supplementary material
Source: PubMed Central journal article supplement (PMC4940129)
Supplement: NIHMS777036-supplement-Supplementary_Information.pdf [file NIHMS777036-supplement-Supplementary_Information.pdf]

Electronic Supplementary Information for:

## Characterization of the [3Fe-4S]<sup>0/1+</sup> cluster from the D14C variant of *Pyrococcus furiosus* ferredoxin via combined NRVS and DFT analyses

Lars Lauterbach,<sup>\*a,b</sup> Leland B. Gee,<sup>a</sup> Vladimir Pelmentschikov,<sup>\*b</sup> Francis E. Jenney Jr,<sup>c</sup> Saeed Kamali,<sup>a,d</sup> Yoshitaka Yoda,<sup>e</sup> Michael W. W. Adams<sup>f</sup> and Stephen P. Cramer<sup>a,g</sup>

<sup>a</sup> Department of Chemistry, University of California, Davis, CA 95616, USA

<sup>b</sup> Institut für Chemie, Technische Universität Berlin, 10623 Berlin, Germany.

<sup>c</sup> Georgia Campus, Philadelphia College of Osteopathic Medicine, Suwanee, GA 30024, USA

<sup>d</sup> Department of Mechanical, Aerospace and Biomedical Engineering, University of Tennessee Space Institute, Tullahoma, TN 37388, USA

<sup>e</sup> JASRI, SPring-8, Sayo-gun, Hyogo 679-5198, Japan

<sup>f</sup> Department of Biochemistry & Molecular Biology, Life Sciences Building, University of Georgia, Athens, GA 30602, USA

<sup>g</sup> Physical Biosciences Division, Lawrence Berkeley National Laboratory, Berkeley, CA 94720, USA

\* Corresponding authors. E-mails: [lars.lauterbach@tu-berlin.de](mailto:lars.lauterbach@tu-berlin.de); [pelmentschikov@tu-berlin.de](mailto:pelmentschikov@tu-berlin.de)

### CONTENTS

|                                                 |     |
|-------------------------------------------------|-----|
| List of Figures .....                           | S1  |
| List of Tables.....                             | S1  |
| Experimental Materials and Methods.....         | S2  |
| Preparation .....                               | S2  |
| Mössbauer Spectroscopy .....                    | S2  |
| NRVS Measurements .....                         | S2  |
| DFT Calculations .....                          | S3  |
| Mössbauer Spectroscopy Results.....             | S4  |
| [3Fe-4S] Cluster: Spin Coupling .....           | S5  |
| [3Fe-4S] Cluster: Structural Aspects.....       | S6  |
| [3Fe-4S] Cluster: Reorganization Energies ..... | S7  |
| References .....                                | S19 |

### List of Figures

|                                                                                                                                                     |     |
|-----------------------------------------------------------------------------------------------------------------------------------------------------|-----|
| Fig. S1 Mössbauer spectra of [3Fe-4S]-containing <i>Pf</i> Fd D14C.....                                                                             | S8  |
| Fig. S2 Overlay of the <i>Pf</i> Fd D14C cluster reference PDB structure with the DFT model .....                                                   | S8  |
| Fig. S3 Overlay of the observed NRVS and representative DFT-calculated <sup>57</sup> Fe-PVDOS spectra .....                                         | S9  |
| Fig. S4 Overlay of the observed NRVS and BS state variants of the DFT-calculated <sup>57</sup> Fe-PVDOS spectra for [3Fe-4S] <i>Pf</i> Fd D14C..... | S10 |

### List of Tables

|                                                                                                                        |     |
|------------------------------------------------------------------------------------------------------------------------|-----|
| Table S1 Mössbauer parameters for the iron sites of the oxidized and reduced [3Fe-4S] cluster .....                    | S11 |
| Table S2 Relative BS energies and Fe Mulliken spin populations for the <i>Pf</i> Fd D14C [3Fe-4S] cluster .....        | S11 |
| Table S3 Fe–Fe and bonding Fe–S internuclear distances of the <i>Pf</i> Fd (D14C) [3Fe-4S] and [4Fe-4S] clusters ..... | S12 |
| Tables S4-S9 Cartesian coordinates and total absolute energies of the DFT-optimized models .....                       | S13 |

## Experimental Materials and Methods

**Preparation.** The D14C ferredoxin from *Pyrococcus furiosus* was produced, purified, and uniformly  $^{57}\text{Fe}$  labelled as previously described.<sup>1</sup> D14C (70  $\mu\text{M}$  in 100 mM Tris pH 8.0) was treated and stirred aerobically with a 40 fold molar excess of  $\text{K}_3[\text{Fe}(\text{CN})_6]$  and EDTA overnight at 25°C in order to obtain the [3Fe-4S] form. The protein samples were then concentrated (Amicon Ultra-4 3 kDa MWCO, Millipore) and washed in 100 mM Tris pH 8.0 buffer. The oxidized sample was loaded into the NRVS cell directly. For reduction, the sample was treated with 100 mM Tris pH 8.0 containing 20 mM sodium dithionite in an anaerobic box by repeated washing and concentrating with Amicon Ultras. This sample was loaded into a Lucite NRVS cuvette inside the chamber and sealed with vacuum grease. All samples were immediately flash frozen in liquid nitrogen.

**Mössbauer Spectroscopy.** Mössbauer spectra were recorded on a SEE Co. spectrometer working in a constant acceleration mode in transmission geometry. The measurements were performed at 80 K using a Janis cryostat. A 100 mCi  $^{57}\text{Co}$  in a Rh matrix held at room temperature (RT) was used as source. The spectra were least square fitted using Recoil software.<sup>2</sup> All centroid shifts,  $\delta$ , are given with respect to metallic  $\alpha$ -iron at RT. The parameters from the fittings, which are centroid shift Centroid shift ( $\delta$ ), quadrupole splitting ( $\Delta E_Q$ ), linewidth ( $\Gamma$ ), and intensity ( $I$ ) are summarized in Table 1.

**NRVS Measurements.** Nuclear resonance vibrational spectroscopy measurements were performed at SPring-8 BL09XU with a 0.8 meV energy resolution at 14.4125 keV as described previously.<sup>3</sup> A 4-element avalanche photo diode detector array was used to detect delayed nuclear fluorescence and K fluorescence by  $^{57}\text{Fe}$  atoms. All measurements were performed at a 10 K reading of the cryostat sensor. The real sample temperature, as obtained from the spectral analysis, was 30–80 K. The raw data were analyzed with the PHOENIX software<sup>4</sup> to gain the iron partial vibrational density of states ( $^{57}\text{Fe}$ -PVDOS).

## DFT Calculations

Initial coordinates for the DFT calculations were extracted from PDB 3PNI, based on the 2.8 Å resolution X-ray diffraction (XRD) analysis of the chemically oxidized *Pf* Fd D14C crystals.<sup>5</sup> The three Cys11/17/56 ligands to the [3Fe-4S] cluster core were modeled using CH<sub>3</sub>CH<sub>2</sub>S<sup>-</sup> ethylthiolates, and Cys14 of the D14C protein variant was modeled using CH<sub>3</sub>CH<sub>2</sub>SH ethylthiol as shown in Fig. S2. The cluster core has not been protonated, ensured by the experimental pH 8.0 conditions (protonation of the [3Fe-4S]<sup>0</sup> reduced core has been indicated for *Azotobacter vinelandii* ferredoxin I (*Av* FdI) at acidic pH < 7.0).<sup>6</sup> The resulting 40-atoms model complex can then be denoted as [[Fe<sub>3</sub>S<sub>4</sub>](CH<sub>3</sub>CH<sub>2</sub>S)<sub>3</sub>(CH<sub>3</sub>CH<sub>2</sub>SH)]<sup>3-/2-</sup>, respectively for the [3Fe-4S]<sup>0/1+</sup> cluster oxidation levels.

The broken-symmetry (BS)<sup>7</sup> electronic structures were constructed using an option to assign a number of unpaired  $\alpha/\beta$  electrons to Fe atomic fragments, as implemented in JAGUAR 7.9.<sup>8</sup> These BS densities were used as starting points for geometry optimizations and analytic Hessian calculations employing harmonic approximation using GAUSSIAN 09, Revision D.01.<sup>9</sup> The four cysteine C $\alpha$  positions, represented by methyl carbons of the [Fe<sub>3</sub>S<sub>4</sub>](CH<sub>3</sub>CH<sub>2</sub>S)<sub>3</sub>(CH<sub>3</sub>CH<sub>2</sub>SH) model, were fixed to their original XRD positions during geometry optimization (Fig. S2). This level of protein restraint has been found optimal in our earlier studies on the [4Fe-4S]<sup>1+/2+</sup> and [4Fe-4S]<sup>0/1+/2+</sup> cubanes from *Pf* Fd D14C and *Azotobacter vinelandii* nitrogenase Fe protein (*Av*2), respectively.<sup>1, 10</sup> Further protein environment of the [3Fe-4S] cluster was considered via self-consistent reaction field (SCRF) polarizable continuum model using the integral equation formalism (IEF-PCM)<sup>11</sup> as implemented in GAUSSIAN, with the static dielectric constant set to  $\epsilon = 4.0$  as often used for proteins, and the remaining IEF-PCM parameters at their default values for water. The SCRF molecular cavity was built using UFF atomic radii scaled by 1.1. Using dielectric screening with  $\epsilon = 4.0$  or water-like  $\epsilon = 80.0$  environment has been earlier shown to improve optimized structures accuracy in [[Fe<sub>3</sub>S<sub>4</sub>](CH<sub>3</sub>S)<sub>3</sub>]<sup>3-</sup>, [[Fe<sub>4</sub>S<sub>4</sub>](CH<sub>3</sub>S)<sub>4</sub>]<sup>2-</sup>, and [[Fe<sub>4</sub>S<sub>4</sub>](CH<sub>3</sub>CH<sub>2</sub>S)<sub>4</sub>]<sup>4-/3-/2-</sup> DFT models of protein-bound clusters [3Fe-4S]<sup>0</sup>, [4Fe-4S]<sup>2+</sup>, and [4Fe-4S]<sup>0/1+/2+</sup>, respectively;<sup>10, 12, 13</sup> in absence of dielectric screening (optimization in vacuum), significant negative charge of these models leads to unrealistic expansion of the Fe-S core.

In consistency with the previous study on the *Pf* Fd D14C [4Fe-4S] cluster,<sup>1</sup> the generalized gradient approximation (GGA) PW91<sup>14</sup> density functional was used for all the calculations if not otherwise mentioned. A customized B(5HF)P86<sup>15, 16</sup> hybrid functional based on the GGA BP86<sup>17, 18</sup> has been additionally used for tests on the relative energies of the BS states and electronic structures. While non-hybrid PW91 and BP86 (0% of Hartree-Fock exchange) are known to perform well on Fe-S cluster geometries and normal modes,<sup>12, 16, 19-21</sup> a calibrated level of 5% Hartree-Fock exchange in the customized B(5HF)P86 functional has been indicated to give optimal description of covalency in Fe-S clusters.<sup>15, 16</sup>

The LACV3P\*\* basis set as implemented in JAGUAR was used for all the calculations, implying a 6-311G\*\* triple- $\zeta$  basis set including polarization function for the 1<sup>st</sup>- and 2<sup>nd</sup>-row elements. For the Fe atom, LACV3P\*\* uses the Los Alamos effective core potential (ECP), and the valence part is essentially of triple- $\zeta$  quality. Relevant to NRVS, the <sup>57</sup>Fe isotope mass was used for the normal mode analysis following Hessian calculations. Based on the normal mode outputs from GAUSSIAN, <sup>57</sup>Fe partial vibrational density of states (<sup>57</sup>Fe-PVDOS) and kinetic energy distribution (KED) spectral profiles were generated using Q-SPECTOR, an in-house Python tool successively applied as well earlier.<sup>1, 10, 22-25</sup> To empirically account for the resolution of the present NRVS experiment, the simulated spectra were broadened by convolution with a FWHM = 14 cm<sup>-1</sup> Lorentzian.

## Mössbauer Spectroscopy Results

The [3Fe-4S] clusters show two physiological redox states. The oxidized form of the cluster [3Fe-4S]<sup>1+</sup> has the electronic spin of  $S = 1/2$ , which results from spin-frustrated coupling of three high-spin ferric ( $S = 5/2$ ) ions. The reduced [3Fe-4S]<sup>0</sup> form has a  $S = 2$  ground state due to antiferromagnetic coupling of the ferric ion to two mixed-valent ( $\text{Fe}^{2.5+}$ ) ions ( $S = 9/2$ ).<sup>26, 27</sup>

Mössbauer spectra were measured on oxidized and reduced samples of D14C within the same sample cuvette as for NRVS. The spectrum from the oxidized sample exhibits one doublet (see Fig. S1). Due to the asymmetry of the lines, the spectrum is fitted with two doublets with close lying hyperfine parameters. The 1<sup>st</sup> component has  $\delta = 0.257$  mm/s and  $\Delta E_Q = 0.534$  mm/s. The 2<sup>nd</sup> component has  $\delta = 0.328$  mm/s and  $\Delta E_Q = 0.638$  mm/s. The widths are 0.30 mm/s and 0.41 mm/s, respectively. These parameters are typical for high-spin  $\text{Fe}^{3+}$  with thiolate ligands in tetrahedral geometry. It is worth-mentioning that the reason for having two subspectra is due to the different environments for Fe atoms. Although the electronic structure for all atoms is the same, i.e. being in the high-spin  $\text{Fe}^{3+}$ , the slightly different ligands and/or small differences of the charge distributions at different Fe atoms give rise to different quadrupole splitting, resulting in the asymmetry in the spectrum. This shows all three irons of the [3Fe-4S] cluster have the same redox state in its oxidized state. Reduction by one electron by dithionite results in a  $S = 2$  state. The Mössbauer spectrum for the reduced cluster consists of three doublets. The 1<sup>st</sup> doublet has  $\delta = 0.307$  mm/s and  $\Delta E_Q = 0.475$  mm/s, which are typical values for high-spin  $\text{Fe}^{3+}$ . The 2<sup>nd</sup> doublet has  $\delta = 0.446$  mm/s and  $\Delta E_Q = 1.396$  mm/s, representing a valence-delocalized  $\text{Fe}^{2.5+}$  pair with a shared electron between two irons.<sup>27, 28</sup> The ratio of these components is 1:2. The 3<sup>rd</sup> doublet, X, has  $\delta = 0.403$  mm/s and  $\Delta E_Q = 0.406$  mm/s. The values are close to the values for the weighted average between  $\text{Fe}^{3+}$  and  $\text{Fe}^{2.5+}$ . Previous Mössbauer studies on Fe-S cluster suggest that this species represent a fully delocalized state with one electron equally spread over all three irons,<sup>27</sup> with a temperature-dependent contribution. The intensity of this component, 24%, is in the range of the previous study.<sup>27</sup> The comparison of our results with Mössbauer spectra of the [4Fe-4S] form of Pf Fd D14C from an earlier study<sup>1</sup> reveals that the oxidized and the reduced sample are in a homogenous state and the conversion of the [4Fe-4S] to [3Fe-4S] form was complete.

### [3Fe-4S] Cluster: Spin Coupling

As disclosed previously,<sup>26, 27, 29</sup> a [2Fe↑:1Fe↓] spin-coupling pattern applies to both oxidation levels of the [3Fe-4S] cluster considered here, where '↑' and '↓' respectively denote  $M_{S_i} > 0$  and  $M_{S_i} < 0$  for the spin-projection values of the Fe $_i$  iron site spins  $S_i$ ,  $i = 1, 2, 3$ . Three combinations are available for the [2Fe↑:1Fe↓] broken-symmetry (BS) pattern distribution among the three Fe ions. These BS states can be named as BS12, BS13, and BS23 after the Fe $_i$  numbers of the two spin-up sites ([2Fe↑]); here, the Fe $_i$  numbering scheme follows Figs. 1 and S2. At the [3Fe-4S]<sup>0/1+</sup> oxidation levels, the relative energies between the three structurally optimized BS states are respectively within 1.0/0.2 kcal/mol using PW91 and within 0.5/0.2 kcal/mol using B(5HF)P86 DFT functionals (Table S2). Because these energy differences are within the inherent accuracy limits of DFT, they cannot provide a conclusive preference to any of the three BS states. A comparison of the observed and BS-dependent calculated <sup>57</sup>Fe-PVDOS spectra in Fig. S4 does not favor particular BS state either. BS12, which has the lowest energy in most of the cases (except the PW91 calculation on [3Fe-4S]<sup>1+</sup>), has been regarded as the representative spin configuration reported in this study; see further support for BS12 below.

A strong inhomogeneity of Fe $_i$  spin densities (which approximate the  $M_{S_i}$  values) reported in Table S2 for the [3Fe-4S]<sup>1+</sup> ( $S = 1/2$ ) oxidized cluster is indicative of spin-frustration (which implies  $S_i$  vector orientations different from parallel or antiparallel) between the three high-spin ferric (Fe<sup>3+</sup>,  $d^5$ ,  $S = 5/2$ ) iron sites; for the computed [3Fe-4S]<sup>1+</sup> Fe $_1/2/3$  spin densities of BS12, we note a qualitative correspondence to the  $A_i = 5/18/-41$  MHz isotropic parts of the Fe $_i$  magnetic hyperfine interaction tensors observed for [3Fe-4S]<sup>1+</sup> from Av FdI.<sup>26</sup> In contrast, Fe $_i$  spin densities obtained for the [3Fe-4S]<sup>0</sup> ( $S = 2$ ) reduced cluster are largely homogeneous in their magnitudes; accepting for moderate spin density deviations from their intrinsic values within the cluster, the BS12 solution here corresponds to a (ferromagnetic) mixed-valence pair formed by Fe $_1$  and Fe $_2$  (Fe<sup>2.5+</sup>,  $S = 9/4$ ), coupled antiferromagnetically to ferric Fe $_3$ .<sup>27</sup> Provided the Fe sites permutation, solutions received for BS13 and BS23 bear their qualities similar to BS12 at both [3Fe-4S]<sup>0/1+</sup> oxidation levels (Table S2). Finally, PW91 and B(5HF)P86 provide qualitatively similar electronic structures, with magnitudes of Fe $_i$  spin densities somewhat higher from the hybrid B(5HF)P86 functional.

Via combination of EPR, variable-temperature magnetic circular dichroism (VTMCD), and sequence specific <sup>1</sup>H NMR spectroscopies, the identity of the noncoordinating residue equivalent to position 14 in *Pf* Fd has been indicated as a determinant in the location of the reducible pair of irons in [3Fe-4S] clusters of wild-type and mutant ferredoxins.<sup>30, 31</sup> This residue is at position X(II) of the conserved C(I)-X-X-X(II)-X-X-C(III) polypeptide cluster binding motif; for *Pf* Fd D14C, C(I) = Cys11, X(II) = Cys14, and C(III) = Cys17. For the X(II) = C(II) = Cys case, it has been concluded that the two Fe coordinated by C(I) and C(III) cysteines form the reducible pair, and the remaining Fe coordinated by cysteine outside the conserved motif (here, Cys56) is a 'unique' site.<sup>30, 31</sup> Our selection of BS12 to underlie the representative DFT results (see above) is then consistent with the outlined spectroscopic indication: Fe $_1$  and Fe $_2$  form the reducible pair, and Fe $_3$  remains 'unique' high-spin ferric in [3Fe-4S]<sup>0/1+</sup> of *Pf* Fd D14C.

### [3Fe-4S] Cluster: Structural Aspects

Trends in redox-dependent structural shifts in the *Pf* Fd D14C [3Fe-4S]/[4Fe-4S] clusters, well mapped by observed and DFT-simulated NRVS ( $^{57}\text{Fe}$ -PVDOS) vibrational properties, are discussed in the main text employing averaged Fe–Fe/S<sub>i</sub>/S<sub>b</sub> internuclear distances from DFT optimization. This section extends to a comparison of the optimized *Pf* Fd D14C [3Fe-4S]<sup>0/1+</sup> structures to relevant experimental data collected in Table S3; for the [4Fe-4S] cluster from the very same protein, this type of comparison has been carried out earlier.<sup>1</sup>

The only available X-ray diffraction (XRD) structure PDB 3PNI<sup>5</sup> of specifically *Pf* Fd D14C variant is for the oxidized protein and has been presently used as a starting point for the corresponding [3Fe-4S]<sup>1+</sup> DFT modeling. A critical assessment of the DFT structure quality is however problematic here due to a relatively low 2.8 Å resolution of its experimental source, PDB 3PNI. We note that the DFT optimization leads to a consistent mean Fe–Fe/S<sub>i</sub>/S<sub>b</sub> distances expansion by respectively 0.05/0.05/0.04 Å (Table S3). Interestingly, higher 1.5 Å resolution data on the oxidized wild-type (WT) *Pf* Fd variant from PDB 1SJ1<sup>32</sup> shows notable expansion of the cluster, as compared to PDB 3PNI. A critical assessment is impeded here as well due to residual electron density in PDB 1SJ1, observed at location of the missing 4<sup>th</sup> Fe site; notably, the averaged Fe–Fe/S<sub>i</sub>/S<sub>b</sub> distances from PDB 1SJ1 better match those from our DFT modeling on *Pf* Fd D14C [4Fe-4S]<sup>2+/1+</sup>.

As already discussed in the main text, high 1.4 Å resolution determinations PDB 6FD1/6FDR of respectively [3Fe-4S]<sup>0/1+</sup> forms of *Azotobacter vinelandii* ferredoxin (*Av* FdI) displayed structural deviations within experimental error only.<sup>33, 34</sup> Collectively, these two *Av* FdI structures are in better agreement with our DFT modeling of the reduced *Pf* Fd D14C [3Fe-4S]<sup>0</sup> cluster. For the [3Fe-4S]<sup>0</sup> case, the averaged Fe–Fe/S<sub>i</sub>/S<sub>b</sub> distances are different by respectively 0.0/0.06/0.04 Å when comparing the *Av* FdI PDB 6FD1 to our DFT modeling (Table S3).

High-resolution XRD data on a synthetic compound hosting the reduced [Fe<sub>3</sub>S<sub>4</sub>]<sup>0</sup> cluster<sup>35</sup> provides the most consistent match to our [3Fe-4S]<sup>0</sup> DFT structure: here, experiment-to-DFT shift in averaged Fe–Fe/S<sub>i</sub>/S<sub>b</sub> distances is respectively -0.02/0.02/0.02 Å only (Table S3). A comparable level of structural quality has been achieved in an earlier DFT study on the [3Fe-4S]<sup>0</sup> cluster,<sup>12</sup> where the best computational protocol delivered mean absolute error of 0.016 Å in Fe–S bonding distances, as compared to the synthetic [Fe<sub>3</sub>S<sub>4</sub>]<sup>0</sup> species.

A separate comment goes to the Fe–Fe distances distribution, well recognized to be dependent on spin configuration (among other factors, such as protein environment) in Fe-S clusters. While in the all-ferric [3Fe-4S]<sup>1+</sup> cluster the optimized Fe–Fe distances are essentially homogeneous and distribute within 0.03 Å only, for the reduced [3Fe-4S]<sup>0</sup> cluster spin-dependent delocalization in the mixed-valence [Fe<sup>2.5+</sup>↑-Fe<sup>2.5+</sup>↑] pair leads to the corresponding short Fe1–Fe2 distance, as compared to 0.07–0.08 Å longer Fe1/2–Fe3 distances in the two [Fe<sup>2.5+</sup>↑-Fe<sup>3+</sup>↓] pairs (Table S3). This is consistent with the BS12 spin configuration clarified in the previous section. The outlined 'one short / two long' Fe–Fe distances pattern for [3Fe-4S]<sup>0</sup> has been resolved in the synthetic [Fe<sub>3</sub>S<sub>4</sub>]<sup>0</sup> species XRD structure as well.<sup>35</sup>

### [3Fe-4S] Cluster: Reorganization Energies

The present analysis focuses on  $\lambda_i$  self-exchange inner-sphere contribution to the reorganization energy  $\lambda$  of the *Pf* Fd D14C [3Fe-4S]<sup>0/1+</sup> cluster. Here, the inner-sphere implies the cluster inorganic core and its first coordination sphere, represented by the DFT model. Calculation of  $\lambda_i$  was done in a manner following Ryde et al<sup>36, 37</sup> and others<sup>1, 12, 19, 21</sup>:

$$\begin{aligned}\lambda_i &= \lambda_{ox} + \lambda_{red} \\ \lambda_{ox} &= E(\text{Ox}^{\text{Ox}}) - E(\text{Red}^{\text{Ox}}) \\ \lambda_{red} &= E(\text{Red}^{\text{Red}}) - E(\text{Ox}^{\text{Red}})\end{aligned}$$

where  $\lambda_{ox}$ , the reorganization energy during oxidation, is the difference between the energies of the oxidized complex in its equilibrium geometry (Ox<sup>Ox</sup>) and oxidized complex at the equilibrium structure of the reduced complex (Red<sup>Ox</sup>). Similarly, the  $\lambda_{red}$  reorganization energy during reduction is the difference between the energies of the reduced complex in its equilibrium geometry (Red<sup>Red</sup>) and reduced complex at the equilibrium structure of the oxidized complex (Ox<sup>Red</sup>).

The representative spin configuration BS12 (as detailed above) has been selected for the *Pf* Fd D14C [3Fe-4S]<sup>0/1+</sup> cluster reorganization energy assessment, and the values computed are collected as BS12 <sub>$\lambda$</sub>  (kcal/mol) in Table S2. These values translate to  $\lambda_{ox} = 52.7$ ,  $\lambda_{red} = 58.6$ , and  $\lambda_i = 111.3$  kJ/mol using the PW91 functional; alternative application of the B(5HF)P86 functional leads to a very similar result of  $\lambda_{ox} = 51.9$ ,  $\lambda_{red} = 60.7$ , and  $\lambda_i = 112.5$  kJ/mol. A previous study on the *Pf* Fd D14C [4Fe-4S]<sup>1+/2+</sup> cluster employing the equivalent DFT protocol provided  $\lambda_i = 18.8$  kJ/mol.<sup>1</sup> Within the very same *Pf* Fd D14C protein framework, our results therefore indicate  $113.3/18.8 \approx 6$  higher reorganization energy of the [3Fe-4S]<sup>0/1+</sup> cluster as compared to the [4Fe-4S]<sup>1+/2+</sup> variant.

We note that reorganization energies calculated for Fe–S clusters vary significantly depending on the computational protocol and environment treatment, as discussed earlier.<sup>1, 12, 21</sup>  $\lambda_i = 67$  kJ/mol has been reported for a generic [3Fe-4S]<sup>0/1+</sup> cluster,<sup>12</sup> and broad range of  $\lambda_i \approx 18$  to 50 kJ/mol is available from the literature on [4Fe-4S]<sup>1+/2+</sup>.<sup>21, 37, 38</sup> Notably, our modeling of *both* [3Fe-4S] and [4Fe-4S] clusters from *Pf* Fd D14C included (i) all four Cys ligands (as shown in Fig. S2) coordinating the [4Fe-4S] variant prior to its oxidative damage, (ii) C $\alpha$  carbon fixations to their original XRD positions, and (iii) implicit protein environment; the outer-sphere  $\lambda_o$  contribution to the reorganization energy is then partially accounted as well. This adds extra confidence in relative assessment of the *Pf* Fd D14C [3Fe-4S]<sup>0/1+</sup> and [4Fe-4S]<sup>1+/2+</sup> clusters reorganization energies as given above.

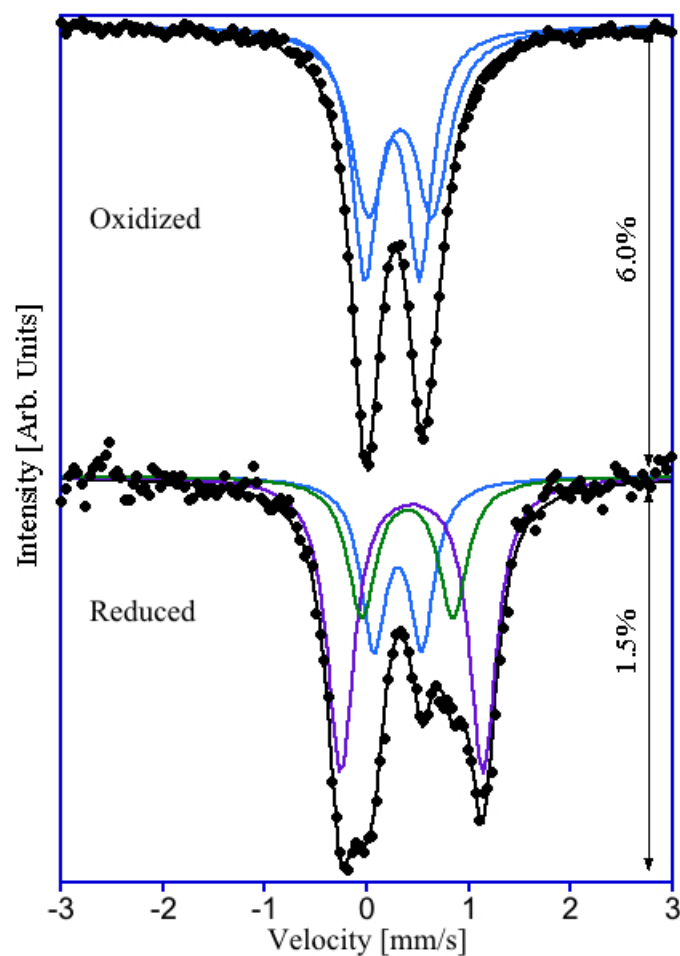

**Fig. S1** Mössbauer spectra of [3Fe-4S]-containing *Pf* Fd D14C recorded at 80 K. Black circles represent oxidized and reduced D14C experimental Mössbauer data. The subspectra are Lorentzian doublets of Fe<sup>3+</sup> (blue), Fe<sup>2.5+</sup> (violet) and species X (green, see text and Table S1 for details). The sum of subspectra is shown in black lines.

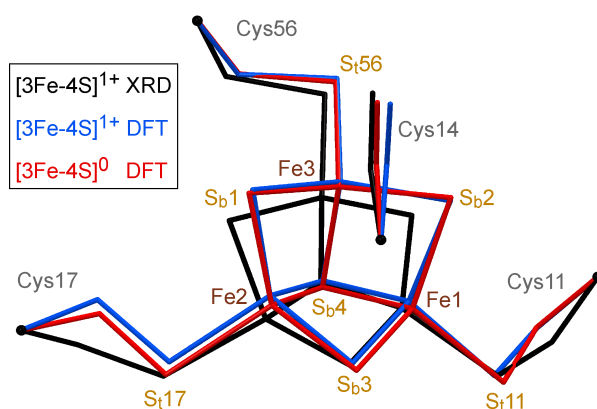

**Fig. S2** Overlay of the *Pf* Fd D14C [3Fe-4S]<sup>1+</sup> cluster reference PDB 3PNI<sup>5</sup> XRD structure (black) with the DFT model optimized at the [3Fe-4S]<sup>1+</sup> oxidized (blue) and [3Fe-4S]<sup>0</sup> reduced (red) levels. The Fe/S atom labels are given in brown/yellow, respectively. Hydrogen atoms are omitted for clarity, and Cys14 sulfur is protonated. The four cysteine alpha-carbons fixed to their original crystallographic positions during the optimization are marked with black spheres. All models are shown in 0.05 Å radius tubes.



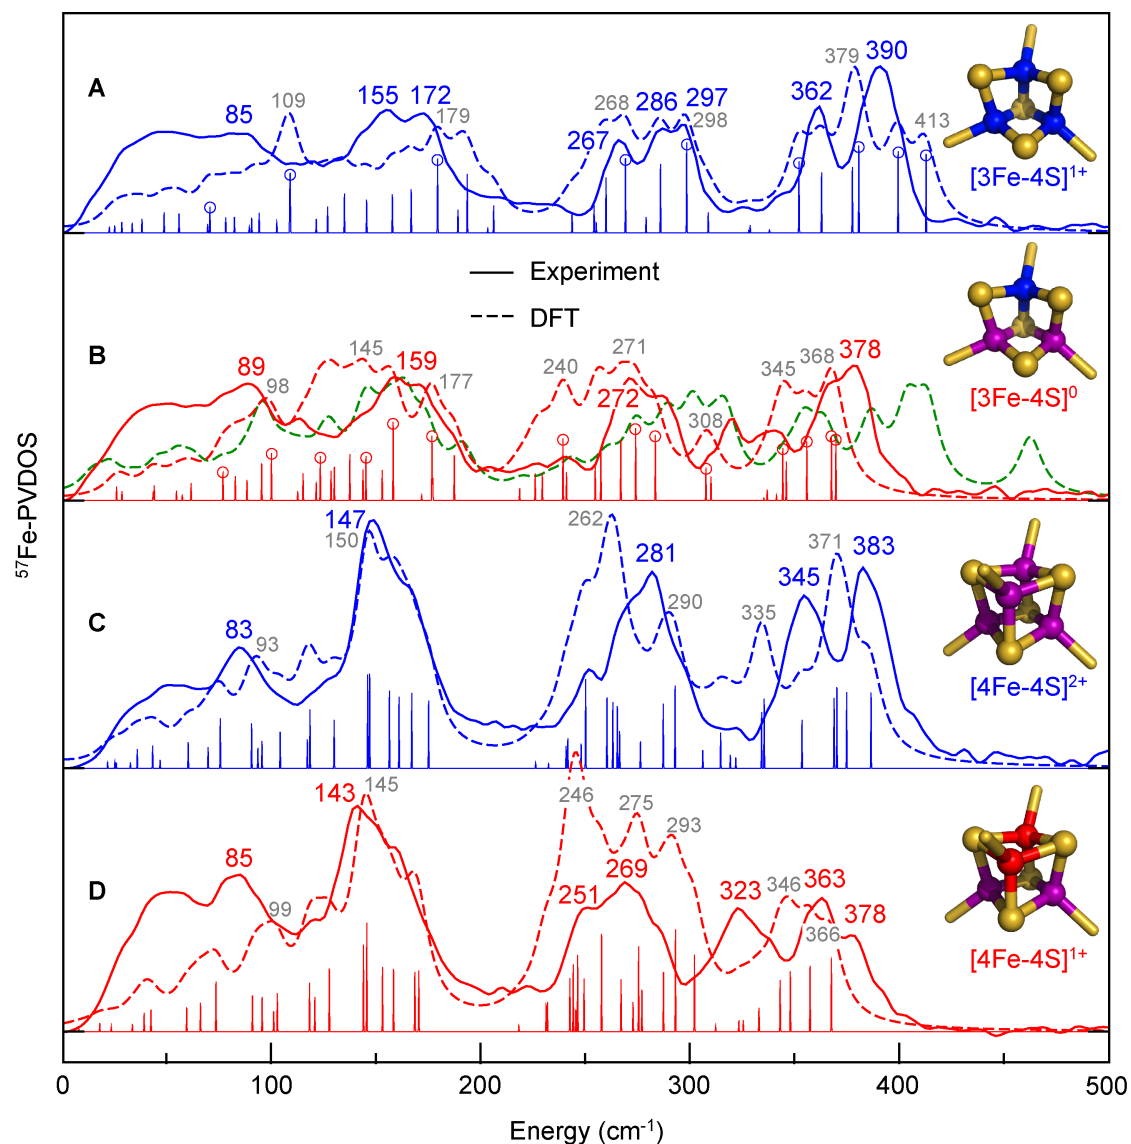

**Fig. S3** Overlay of the observed NRVS (solid line) and representative DFT-calculated (broken line)  $^{57}\text{Fe}$ -PVDOS spectra for the  $^{57}\text{Fe}$ -enriched [3Fe-4S] and [4Fe-4S] variants of *Pf* Fd D14C at the reduced and oxidized levels. The non-broadened intensities (and normal mode positions) from DFT are given in stick-style. On right, electronic structures of the Fe-S clusters are schematically shown, where  $\text{Fe}^{3+/2.5+/2+}$  are in blue/purple/red, respectively, and sulfide ligands are in yellow. *Top to bottom*: [3Fe-4S] $^{1+}$  (A); [3Fe-4S] $^0$  (B); [4Fe-4S] $^{2+}$  (C); [4Fe-4S] $^{1+}$  (D). For the selected [3Fe-4S] $^{0/1+}$  normal modes labeled with circles (A,B), animated GIF files are available as separate part of ESI $^\dagger$ . In (B), the green line corresponds to the reduced [3Fe-4S] $^0$  state DFT modeling using the equilibrium structure of the oxidized [3Fe-4S] $^{1+}$  state. The data on the [4Fe-4S] variant have been in part published previously. $^1$

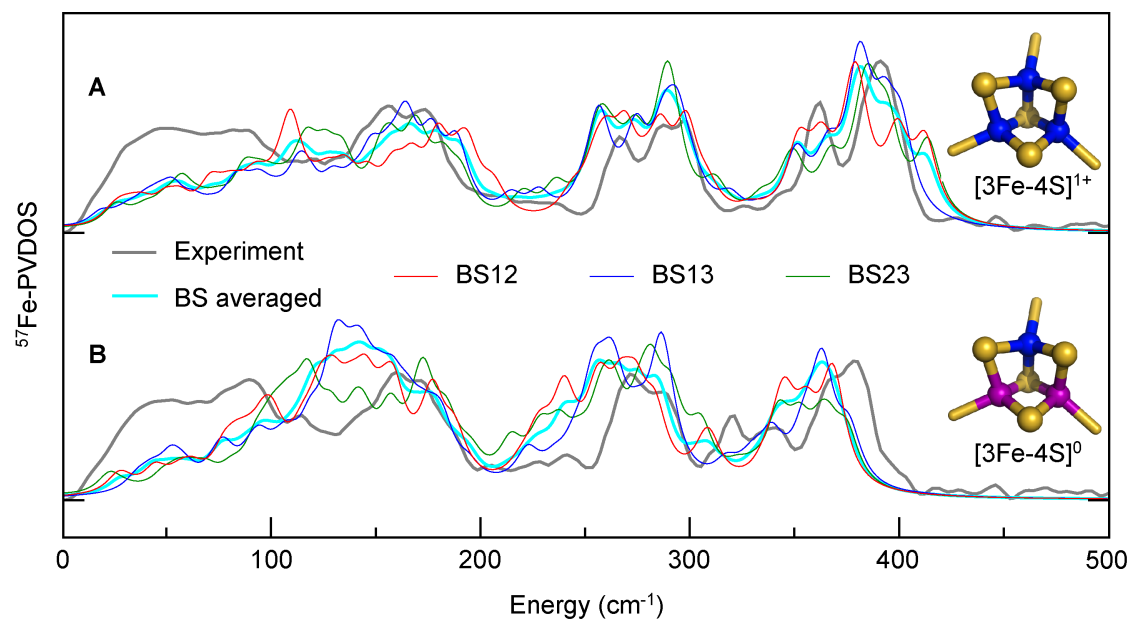

**Fig. S4** Overlay of the observed NRVS and broken-symmetry (BS) state variants of the DFT-calculated  $^{57}\text{Fe}$ -PVDOS spectra for the  $^{57}\text{Fe}$ -enriched  $[\text{3Fe-4S}]$  Pf Fd D14C at the oxidized  $[\text{3Fe-4S}]^{1+}$  (A) and reduced  $[\text{3Fe-4S}]^0$  (B) levels. The experimental line is in grey, BS12 in red, BS13 in blue, BS23 in green, and arithmetic mean from the three BS states spectra is in cyan. BS12 is the representative DFT solution used to report  $[\text{3Fe-4S}]$  Pf Fd D14C spectra elsewhere in this study (Figs. 2 and S3). On right, electronic structures of the  $[\text{3Fe-4S}]$  cluster are schematically shown, where  $\text{Fe}^{3+/2.5+/2+}$  are in blue/purple/red, respectively, and sulfide ligands are in yellow.

**Table S1** Mössbauer parameters for the iron sites of the oxidized and reduced [3Fe-4S] cluster. Centroid shift ( $\delta$ ), quadrupole splitting ( $\Delta E_Q$ ), Lorentzian linewidth ( $\Gamma$ ) and intensities ( $I$ ) are shown.

|                          | Type and $S_{\text{tot}}$ | $\delta$ (mm/s) | $\Delta E_Q$ (mm/s) | $\Gamma$ (mm/s) | $I$ (%) |
|--------------------------|---------------------------|-----------------|---------------------|-----------------|---------|
| <b>ox. D14C</b>          | [3Fe-4S] <sup>1+</sup>    |                 |                     |                 |         |
| <b>Fe<sup>3+</sup></b>   | $S = 1/2$                 | 0.257           | 0.534               | 0.30            | 50      |
| <b>Fe<sup>3+</sup></b>   |                           | 0.328           | 0.638               | 0.41            | 50      |
| <b>red. D14C</b>         | [3Fe-4S] <sup>0</sup>     |                 |                     |                 |         |
| <b>Fe<sup>3+</sup></b>   | $S = 2$                   | 0.307           | 0.475               | 0.29            | 26      |
| <b>Fe<sup>2.5+</sup></b> |                           | 0.446           | 1.396               | 0.32            | 49      |
| <b>species X</b>         |                           | 0.403           | 0.896               | 0.33            | 25      |

**Table S2** Relative energies in three broken-symmetry (BS) states and Mulliken spin populations for the three iron sites of the *Pf* Fd D14C [3Fe-4S]<sup>0/1+</sup> cluster from DFT calculations using PW91 (top) and B(5HF)P86 (bottom) functionals.<sup>a</sup>

|                           | Relative Energy (kcal/mol) and Spin Population ( $e$ ) |                                                   |       |       |                       |                                                   |       |       |
|---------------------------|--------------------------------------------------------|---------------------------------------------------|-------|-------|-----------------------|---------------------------------------------------|-------|-------|
|                           | [3Fe-4S] <sup>1+</sup>                                 |                                                   |       |       | [3Fe-4S] <sup>0</sup> |                                                   |       |       |
|                           | BS12                                                   | BS12 <sub><math>\lambda</math></sub> <sup>d</sup> | BS13  | BS23  | BS12                  | BS12 <sub><math>\lambda</math></sub> <sup>d</sup> | BS13  | BS23  |
|                           | <b>PW91</b>                                            |                                                   |       |       |                       |                                                   |       |       |
| <b>Energy<sup>b</sup></b> | 0.0                                                    | +12.6                                             | +0.7  | +1.0  | 0.0                   | +14.0                                             | -0.1  | -0.2  |
| <b>Fe1<sup>c</sup></b>    | 1.50                                                   | 1.37                                              | 2.55  | -3.02 | 3.34                  | 3.06                                              | 3.31  | -3.28 |
| <b>Fe2<sup>c</sup></b>    | 2.49                                                   | 2.98                                              | -3.13 | 1.20  | 3.35                  | 3.15                                              | -3.30 | 3.32  |
| <b>Fe3<sup>c</sup></b>    | -3.13                                                  | -3.23                                             | 1.44  | 2.83  | -3.31                 | -3.16                                             | 3.35  | 3.34  |
|                           | <b>B(5HF)P86</b>                                       |                                                   |       |       |                       |                                                   |       |       |
| <b>Energy<sup>b</sup></b> | 0.0                                                    | +12.4                                             | +0.5  | 0.0   | 0.0                   | +14.5                                             | +0.1  | +0.2  |
| <b>Fe1<sup>c</sup></b>    | 1.80                                                   | 1.89                                              | 2.87  | -3.25 | 3.43                  | 3.25                                              | 3.41  | -3.42 |
| <b>Fe2<sup>c</sup></b>    | 2.68                                                   | 3.01                                              | -3.33 | 1.33  | 3.44                  | 3.22                                              | -3.44 | 3.42  |
| <b>Fe3<sup>c</sup></b>    | -3.34                                                  | -3.42                                             | 1.52  | 3.05  | -3.44                 | -3.34                                             | 3.44  | 3.43  |

<sup>a</sup> The DFT results from PW91 are representative and implied elsewhere, if not otherwise mentioned.

<sup>b</sup> Energies (kcal/mol) are relatively to BS12 at both oxidation levels.

<sup>c</sup> Fe sites labeling for Mulliken spin populations ( $e$ ) corresponds to Figs. 1 and S2.

<sup>d</sup> BS12 <sub>$\lambda$</sub>  correspond to states Ox<sup>Red</sup>/Red<sup>Ox</sup> of the [3Fe-4S]<sup>0/1+</sup> cluster used for the  $\lambda_{\text{red/ox}}$  reorganization energies calculation, respectively, as explained in the text.

**Table S3** Fe–Fe and bonding Fe–S internuclear distances (Å) in selected ferredoxin [3Fe-4S] and [4Fe-4S] clusters and  $[\text{Fe}_3\text{S}_4(\text{LS}_3)]^{3-}$  model compound from X-ray diffraction (XRD) data analysis and DFT geometry optimization.<sup>a</sup>

|                                                  | Internuclear Distance (Å)                   |                          |                        |                        |                          |                           |
|--------------------------------------------------|---------------------------------------------|--------------------------|------------------------|------------------------|--------------------------|---------------------------|
|                                                  | XRD <sup>b</sup>                            | XRD <sup>c</sup>         | XRD <sup>d</sup>       | XRD <sup>e</sup>       | DFT <sup>f</sup>         | DFT <sup>g</sup>          |
|                                                  | $[\text{Fe}_3\text{S}_4(\text{LS}_3)]^{3-}$ | <i>Av FdI</i>            | <i>Pf Fd WT</i>        | <i>Pf Fd D14C</i>      | <i>Pf Fd D14C</i>        | <i>Pf Fd D14C</i>         |
|                                                  | $[\text{Fe}_3\text{S}_4]^0$                 | $[\text{3Fe-4S}]^{1+/0}$ | $[\text{3Fe-4S}]^{1+}$ | $[\text{3Fe-4S}]^{1+}$ | $[\text{3Fe-4S}]^{1+/0}$ | $[\text{4Fe-4S}]^{2+/1+}$ |
| <b>Fe – Fe</b>                                   |                                             |                          |                        |                        |                          |                           |
| <b>Fe1 – Fe2</b>                                 | 2.67                                        | 2.64 / 2.65              | 2.65                   | 2.53                   | 2.61 / 2.63              |                           |
| <b>Fe1 – Fe3</b>                                 | 2.73                                        | 2.73 / 2.73              | 2.71                   | 2.56                   | 2.60 / 2.70              |                           |
| <b>Fe2 – Fe3</b>                                 | 2.71                                        | 2.67 / 2.65              | 2.75                   | 2.54                   | 2.61 / 2.71              |                           |
| <b>Fe – Fe</b>                                   | 2.70                                        | 2.68 / 2.68              | 2.70                   | 2.54                   | 2.61 / 2.68              | 2.68 / 2.70               |
| <b>Fe – S<sub>t</sub> (terminal cysteinates)</b> |                                             |                          |                        |                        |                          |                           |
| <b>Fe1 – S<sub>t</sub>11</b>                     | 2.33                                        | 2.31 / 2.30              | 2.28                   | 2.18                   | 2.21 / 2.35              |                           |
| <b>Fe2 – S<sub>t</sub>17</b>                     | 2.32                                        | 2.32 / 2.28              | 2.32                   | 2.18                   | 2.24 / 2.35              |                           |
| <b>Fe3 – S<sub>t</sub>56</b>                     | 2.31                                        | 2.29 / 2.26              | 2.23                   | 2.21                   | 2.27 / 2.32              |                           |
| <b>Fe – S<sub>t</sub></b>                        | 2.32                                        | 2.31 / 2.28              | 2.28                   | 2.19                   | 2.24 / 2.34              | 2.27 / 2.32               |
| <b>Fe – S<sub>b</sub> (bridging inorganic)</b>   |                                             |                          |                        |                        |                          |                           |
| <b>Fe1</b>                                       |                                             |                          |                        |                        |                          |                           |
| – S <sub>b</sub> 2                               | 2.25                                        | 2.29 / 2.21              | 2.32                   | 2.24                   | 2.17 / 2.27              |                           |
| – S <sub>b</sub> 3                               | 2.28                                        | 2.28 / 2.32              | 2.17                   | 2.18                   | 2.15 / 2.32              |                           |
| – S <sub>b</sub> 4                               | 2.33                                        | 2.32 / 2.32              | 2.33                   | 2.10                   | 2.23 / 2.38              |                           |
| <b>Fe1 – S<sub>b</sub></b>                       | 2.29                                        | 2.30 / 2.28              | 2.27                   | 2.17                   | 2.18 / 2.32              |                           |
| <b>Fe2</b>                                       |                                             |                          |                        |                        |                          |                           |
| – S <sub>b</sub> 1                               | 2.25                                        | 2.21 / 2.20              | 2.26                   | 2.23                   | 2.21 / 2.26              |                           |
| – S <sub>b</sub> 3                               | 2.27                                        | 2.28 / 2.29              | 2.25                   | 2.21                   | 2.20 / 2.33              |                           |
| – S <sub>b</sub> 4                               | 2.31                                        | 2.33 / 2.33              | 2.31                   | 2.10                   | 2.27 / 2.37              |                           |
| <b>Fe2 – S<sub>b</sub></b>                       | 2.28                                        | 2.27 / 2.27              | 2.27                   | 2.18                   | 2.23 / 2.32              |                           |
| <b>Fe3</b>                                       |                                             |                          |                        |                        |                          |                           |
| – S <sub>b</sub> 1                               | 2.24                                        | 2.21 / 2.23              | 2.24                   | 2.21                   | 2.23 / 2.26              |                           |
| – S <sub>b</sub> 2                               | 2.27                                        | 2.23 / 2.24              | 2.34                   | 2.19                   | 2.24 / 2.25              |                           |
| – S <sub>b</sub> 4                               | 2.27                                        | 2.27 / 2.23              | 2.38                   | 2.13                   | 2.32 / 2.31              |                           |
| <b>Fe3 – S<sub>b</sub></b>                       | 2.26                                        | 2.24 / 2.23              | 2.32                   | 2.18                   | 2.26 / 2.27              |                           |
| <b>Fe – (μ<sub>2</sub>)S<sub>b</sub>1/2/3</b>    | 2.26                                        | 2.25 / 2.25              | 2.26                   | 2.21                   | 2.20 / 2.28              |                           |
| <b>Fe – (μ<sub>3</sub>)S<sub>b</sub>4</b>        | 2.31                                        | 2.31 / 2.29              | 2.34                   | 2.11                   | 2.27 / 2.35              |                           |
| <b>Fe – S<sub>b</sub></b>                        | 2.28                                        | 2.27 / 2.26              | 2.29                   | 2.18                   | 2.22 / 2.30              | 2.27 / 2.28               |
| <b>Fe – S<sub>t/b</sub></b>                      |                                             |                          |                        |                        |                          |                           |
| <b>Fe – S<sub>t/b</sub></b>                      | 2.29                                        | 2.28 / 2.27              | 2.29                   | 2.18                   | 2.23 / 2.31              | 2.27 / 2.29               |

<sup>a</sup> Atom labeling corresponds to Figs. 1 and S2. The arithmetic mean distances are shadowed with grey fields.

<sup>b</sup> High-resolution data on  $[\text{Fe}_3\text{S}_4(\text{LS}_3)]^{3-}$  synthetic compound.<sup>35</sup> The atom labeling correspondence (present to ref.<sup>35</sup>) is Fe1/2/3 to Fe(3/1/2); S<sub>b</sub>1/2/3/4 to S(3/4/2/1); S<sub>t</sub>11/17/56 to S(31/11/21).

<sup>c</sup> 1.4 Å resolution data on *Azotobacter vinelandii* ferredoxin from PDB 6FD1/6FDR.<sup>33,34</sup> The atom labeling correspondence (present to ref.<sup>33</sup>) is Fe1/2/3 to Fe2/3/1; S<sub>b</sub>1/2/3/4 to S2/3/1/4; S<sub>t</sub>11/17/56 to S<sub>y</sub>16/49/8.

<sup>d</sup> 1.5 Å resolution data on wild-type *Pf Fd* variant from PDB 1S11.<sup>32</sup>

<sup>e</sup> 2.8 Å resolution data on D14C *Pf Fd* mutant from PDB 3PNI.<sup>5</sup>

<sup>f</sup> This work. Representative BS12 structures are reported.

<sup>g</sup> Selected mean distances from earlier *Pf Fd* D14C [4Fe-4S] DFT modeling.<sup>1</sup>

**Table S4** Cartesian coordinates (Å) and total absolute energies (Hartree) of the *representative* DFT-optimized models using PW91 functional and BS12 broken-symmetry state.

| Oxidized <i>Pf</i> Fd D14C [3Fe-4S] <sup>1+</sup> model                                                                                |           |           |           | Reduced <i>Pf</i> Fd D14C [3Fe-4S] <sup>0</sup> model                                                                                  |           |           |           |
|----------------------------------------------------------------------------------------------------------------------------------------|-----------|-----------|-----------|----------------------------------------------------------------------------------------------------------------------------------------|-----------|-----------|-----------|
| [[Fe <sub>3</sub> S <sub>4</sub> ](CH <sub>3</sub> CH <sub>2</sub> S) <sub>3</sub> (CH <sub>3</sub> CH <sub>2</sub> SH)] <sup>2-</sup> |           |           |           | [[Fe <sub>3</sub> S <sub>4</sub> ](CH <sub>3</sub> CH <sub>2</sub> S) <sub>3</sub> (CH <sub>3</sub> CH <sub>2</sub> SH)] <sup>3-</sup> |           |           |           |
| 40                                                                                                                                     |           |           |           | 40                                                                                                                                     |           |           |           |
| Absolute Energy: -3874.161016                                                                                                          |           |           |           | Absolute Energy: -3874.241079                                                                                                          |           |           |           |
| Fe                                                                                                                                     | 4.459172  | 9.256593  | 17.254875 | Fe                                                                                                                                     | 4.157552  | 9.170956  | 17.226948 |
| Fe                                                                                                                                     | 3.989838  | 11.643482 | 16.317570 | Fe                                                                                                                                     | 3.696602  | 11.567092 | 16.234848 |
| Fe                                                                                                                                     | 5.215857  | 11.345545 | 18.603257 | Fe                                                                                                                                     | 5.117496  | 11.336720 | 18.524805 |
| S                                                                                                                                      | 2.734810  | 9.849057  | 16.108846 | S                                                                                                                                      | 2.197410  | 9.780901  | 16.148840 |
| S                                                                                                                                      | 4.259182  | 9.484077  | 19.403911 | S                                                                                                                                      | 4.222488  | 9.507814  | 19.469802 |
| S                                                                                                                                      | 6.030154  | 10.662907 | 16.536625 | S                                                                                                                                      | 5.867291  | 10.632612 | 16.460422 |
| S                                                                                                                                      | 3.655326  | 12.897832 | 18.105363 | S                                                                                                                                      | 3.584453  | 12.936578 | 18.032540 |
| C                                                                                                                                      | 6.183984  | 6.164044  | 18.836942 | C                                                                                                                                      | 6.183993  | 6.164027  | 18.836950 |
| C                                                                                                                                      | 6.348704  | 6.692845  | 17.414778 | C                                                                                                                                      | 6.302294  | 6.712257  | 17.417385 |
| S                                                                                                                                      | 4.750331  | 7.165568  | 16.595934 | S                                                                                                                                      | 4.666319  | 6.967574  | 16.574137 |
| H                                                                                                                                      | 5.729712  | 6.934743  | 19.476113 | H                                                                                                                                      | 5.607121  | 6.862139  | 19.460201 |
| H                                                                                                                                      | 6.999492  | 7.578032  | 17.401466 | H                                                                                                                                      | 6.825143  | 7.679839  | 17.426788 |
| H                                                                                                                                      | 6.806609  | 5.931721  | 16.763523 | H                                                                                                                                      | 6.885748  | 6.025704  | 16.783959 |
| H                                                                                                                                      | 5.536318  | 5.275530  | 18.856726 | H                                                                                                                                      | 5.675280  | 5.188392  | 18.846039 |
| H                                                                                                                                      | 7.161729  | 5.889487  | 19.265954 | H                                                                                                                                      | 7.181085  | 6.036788  | 19.293373 |
| C                                                                                                                                      | 0.129002  | 10.771015 | 19.114998 | C                                                                                                                                      | 0.129001  | 10.771028 | 19.114979 |
| C                                                                                                                                      | 0.930405  | 11.251639 | 20.315846 | C                                                                                                                                      | 0.954358  | 11.415550 | 20.216120 |
| S                                                                                                                                      | -0.219234 | 11.851160 | 21.646332 | S                                                                                                                                      | -0.163395 | 12.070334 | 21.553987 |
| H                                                                                                                                      | -0.533286 | 9.932377  | 19.375915 | H                                                                                                                                      | -0.458505 | 9.918021  | 19.487425 |
| H                                                                                                                                      | 1.544552  | 10.439960 | 20.723020 | H                                                                                                                                      | 1.639847  | 10.685972 | 20.661912 |
| H                                                                                                                                      | 1.595840  | 12.073666 | 20.026522 | H                                                                                                                                      | 1.551143  | 12.242377 | 19.811210 |
| H                                                                                                                                      | 0.735137  | 12.251503 | 22.523930 | H                                                                                                                                      | 0.805926  | 12.570999 | 22.361595 |
| H                                                                                                                                      | -0.481183 | 11.579124 | 18.686735 | H                                                                                                                                      | -0.559701 | 11.493190 | 18.651340 |
| H                                                                                                                                      | 0.831725  | 10.429493 | 18.340616 | H                                                                                                                                      | 0.812209  | 10.406763 | 18.329052 |
| C                                                                                                                                      | 4.023035  | 15.420899 | 13.654091 | C                                                                                                                                      | 4.022995  | 15.420904 | 13.654046 |
| C                                                                                                                                      | 4.361019  | 14.399898 | 14.739777 | C                                                                                                                                      | 4.508442  | 14.226825 | 14.475811 |
| S                                                                                                                                      | 3.508687  | 12.776975 | 14.443149 | S                                                                                                                                      | 3.455377  | 12.724578 | 14.205744 |
| H                                                                                                                                      | 4.541054  | 16.373684 | 13.848294 | H                                                                                                                                      | 4.672669  | 16.298923 | 13.811411 |
| H                                                                                                                                      | 5.444603  | 14.218515 | 14.778505 | H                                                                                                                                      | 5.546981  | 13.973471 | 14.214224 |
| H                                                                                                                                      | 4.051011  | 14.757512 | 15.731295 | H                                                                                                                                      | 4.488846  | 14.462069 | 15.549372 |
| H                                                                                                                                      | 4.330084  | 15.063513 | 12.660270 | H                                                                                                                                      | 4.019190  | 15.188736 | 12.578236 |
| H                                                                                                                                      | 2.942215  | 15.619998 | 13.621457 | H                                                                                                                                      | 2.997403  | 15.698667 | 13.938453 |
| C                                                                                                                                      | 6.703979  | 14.930041 | 19.886970 | C                                                                                                                                      | 6.704012  | 14.930041 | 19.887025 |
| C                                                                                                                                      | 7.267998  | 13.716321 | 19.158103 | C                                                                                                                                      | 7.279046  | 13.713694 | 19.165537 |
| S                                                                                                                                      | 6.835971  | 12.116248 | 19.998097 | S                                                                                                                                      | 6.779662  | 12.106806 | 19.946037 |
| H                                                                                                                                      | 5.606395  | 14.885826 | 19.917430 | H                                                                                                                                      | 5.605436  | 14.912511 | 19.853043 |
| H                                                                                                                                      | 6.882472  | 13.670467 | 18.130584 | H                                                                                                                                      | 6.945745  | 13.691873 | 18.118962 |
| H                                                                                                                                      | 8.365897  | 13.764102 | 19.103266 | H                                                                                                                                      | 8.379731  | 13.747903 | 19.165580 |
| H                                                                                                                                      | 7.073424  | 14.977642 | 20.921764 | H                                                                                                                                      | 7.012882  | 14.945403 | 20.943025 |
| H                                                                                                                                      | 6.995191  | 15.862390 | 19.374870 | H                                                                                                                                      | 7.047121  | 15.866414 | 19.413997 |

**Table S5** Cartesian coordinates (Å) and total absolute energies (Hartree) of the DFT-optimized models using PW91 functional and BS13 broken-symmetry state.

| Oxidized <i>Pf</i> Fd D14C [3Fe-4S] <sup>1+</sup> model                                                                                |           |           |           | Reduced <i>Pf</i> Fd D14C [3Fe-4S] <sup>0</sup> model                                                                                  |           |           |           |
|----------------------------------------------------------------------------------------------------------------------------------------|-----------|-----------|-----------|----------------------------------------------------------------------------------------------------------------------------------------|-----------|-----------|-----------|
| [[Fe <sub>3</sub> S <sub>4</sub> ](CH <sub>3</sub> CH <sub>2</sub> S) <sub>3</sub> (CH <sub>3</sub> CH <sub>2</sub> SH)] <sup>2-</sup> |           |           |           | [[Fe <sub>3</sub> S <sub>4</sub> ](CH <sub>3</sub> CH <sub>2</sub> S) <sub>3</sub> (CH <sub>3</sub> CH <sub>2</sub> SH)] <sup>3-</sup> |           |           |           |
| 40                                                                                                                                     |           |           |           | 40                                                                                                                                     |           |           |           |
| Absolute Energy: -3874.159877                                                                                                          |           |           |           | Absolute Energy: -3874.241290                                                                                                          |           |           |           |
| Fe                                                                                                                                     | 4.400217  | 9.281904  | 16.967370 | Fe                                                                                                                                     | 4.184847  | 9.087575  | 16.987263 |
| Fe                                                                                                                                     | 3.557816  | 11.612732 | 16.140693 | Fe                                                                                                                                     | 3.650308  | 11.485492 | 15.897650 |
| Fe                                                                                                                                     | 4.985871  | 11.449915 | 18.293573 | Fe                                                                                                                                     | 4.840788  | 11.298902 | 18.294117 |
| S                                                                                                                                      | 2.398253  | 9.704501  | 16.140397 | S                                                                                                                                      | 2.355222  | 9.641913  | 15.803304 |
| S                                                                                                                                      | 4.395456  | 9.551784  | 19.145964 | S                                                                                                                                      | 4.045348  | 9.371756  | 19.299700 |
| S                                                                                                                                      | 5.787002  | 10.947429 | 16.282522 | S                                                                                                                                      | 5.782230  | 10.677296 | 16.211911 |
| S                                                                                                                                      | 3.313308  | 12.807986 | 18.045633 | S                                                                                                                                      | 3.276883  | 12.820577 | 17.697907 |
| C                                                                                                                                      | 6.183969  | 6.163947  | 18.837083 | C                                                                                                                                      | 6.184058  | 6.164091  | 18.836837 |
| C                                                                                                                                      | 6.577231  | 6.919305  | 17.574361 | C                                                                                                                                      | 6.458681  | 6.770181  | 17.465465 |
| S                                                                                                                                      | 5.137342  | 7.231026  | 16.451425 | S                                                                                                                                      | 4.928408  | 6.942775  | 16.433814 |
| H                                                                                                                                      | 5.456592  | 6.747835  | 19.417888 | H                                                                                                                                      | 5.485346  | 6.808907  | 19.388228 |
| H                                                                                                                                      | 7.023258  | 7.890909  | 17.822877 | H                                                                                                                                      | 6.900957  | 7.769730  | 17.576727 |
| H                                                                                                                                      | 7.312599  | 6.349642  | 16.986017 | H                                                                                                                                      | 7.169533  | 6.150901  | 16.895609 |
| H                                                                                                                                      | 5.731250  | 5.191767  | 18.593729 | H                                                                                                                                      | 5.737371  | 5.162401  | 18.745335 |
| H                                                                                                                                      | 7.065500  | 5.984262  | 19.474799 | H                                                                                                                                      | 7.115385  | 6.076669  | 19.423855 |
| C                                                                                                                                      | 0.128990  | 10.770886 | 19.115036 | C                                                                                                                                      | 0.128875  | 10.771084 | 19.115032 |
| C                                                                                                                                      | 0.992329  | 10.921402 | 20.358975 | C                                                                                                                                      | 0.957818  | 11.083317 | 20.350087 |
| S                                                                                                                                      | -0.052654 | 11.486011 | 21.788453 | S                                                                                                                                      | -0.156814 | 11.649847 | 21.730787 |
| H                                                                                                                                      | -0.661202 | 10.017936 | 19.254011 | H                                                                                                                                      | -0.599686 | 9.968185  | 19.304032 |
| H                                                                                                                                      | 1.461602  | 9.968593  | 20.629390 | H                                                                                                                                      | 1.511744  | 10.199304 | 20.684344 |
| H                                                                                                                                      | 1.781159  | 11.662303 | 20.182139 | H                                                                                                                                      | 1.677727  | 11.880829 | 20.132514 |
| H                                                                                                                                      | 0.950660  | 11.606455 | 22.694120 | H                                                                                                                                      | 0.812469  | 11.852632 | 22.658811 |
| H                                                                                                                                      | -0.341052 | 11.725236 | 18.837089 | H                                                                                                                                      | -0.412054 | 11.658781 | 18.756022 |
| H                                                                                                                                      | 0.768666  | 10.454800 | 18.276858 | H                                                                                                                                      | 0.806735  | 10.443787 | 18.313856 |
| C                                                                                                                                      | 4.023024  | 15.421169 | 13.653938 | C                                                                                                                                      | 4.023043  | 15.420764 | 13.654040 |
| C                                                                                                                                      | 4.377243  | 14.210822 | 14.508658 | C                                                                                                                                      | 4.530348  | 14.133344 | 14.294824 |
| S                                                                                                                                      | 3.157899  | 12.835866 | 14.271277 | S                                                                                                                                      | 3.406168  | 12.701719 | 13.950529 |
| H                                                                                                                                      | 4.766352  | 16.223763 | 13.789577 | H                                                                                                                                      | 4.719999  | 16.254290 | 13.845487 |
| H                                                                                                                                      | 5.374156  | 13.826815 | 14.249907 | H                                                                                                                                      | 5.532839  | 13.881481 | 13.918855 |
| H                                                                                                                                      | 4.389232  | 14.472969 | 15.575926 | H                                                                                                                                      | 4.601282  | 14.242300 | 15.386343 |
| H                                                                                                                                      | 3.997001  | 15.160531 | 12.585562 | H                                                                                                                                      | 3.918355  | 15.310620 | 12.563826 |
| H                                                                                                                                      | 3.036026  | 15.820474 | 13.927118 | H                                                                                                                                      | 3.039523  | 15.699076 | 14.058609 |
| C                                                                                                                                      | 6.704018  | 14.929999 | 19.886944 | C                                                                                                                                      | 6.704024  | 14.930062 | 19.887091 |
| C                                                                                                                                      | 7.113305  | 13.736918 | 19.024882 | C                                                                                                                                      | 6.930285  | 13.742653 | 18.953225 |
| S                                                                                                                                      | 6.544110  | 12.112821 | 19.725267 | S                                                                                                                                      | 6.493616  | 12.121028 | 19.745385 |
| H                                                                                                                                      | 5.609575  | 14.989913 | 19.969850 | H                                                                                                                                      | 5.647260  | 14.984878 | 20.184849 |
| H                                                                                                                                      | 6.688902  | 13.822552 | 18.015635 | H                                                                                                                                      | 6.317784  | 13.846612 | 18.045729 |
| H                                                                                                                                      | 8.208268  | 13.684616 | 18.924147 | H                                                                                                                                      | 7.983955  | 13.694940 | 18.638172 |
| H                                                                                                                                      | 7.116407  | 14.847052 | 20.903108 | H                                                                                                                                      | 7.307721  | 14.835806 | 20.802277 |
| H                                                                                                                                      | 7.068515  | 15.872734 | 19.446219 | H                                                                                                                                      | 6.973611  | 15.879915 | 19.393341 |

**Table S6** Cartesian coordinates (Å) and total absolute energies (Hartree) of the DFT-optimized models using PW91 functional and BS23 broken-symmetry state.

| Oxidized <i>Pf</i> Fd D14C [3Fe-4S] <sup>1+</sup> model                                                                                |           |           |           | Reduced <i>Pf</i> Fd D14C [3Fe-4S] <sup>0</sup> model                                                                                  |           |           |           |
|----------------------------------------------------------------------------------------------------------------------------------------|-----------|-----------|-----------|----------------------------------------------------------------------------------------------------------------------------------------|-----------|-----------|-----------|
| [[Fe <sub>3</sub> S <sub>4</sub> ](CH <sub>3</sub> CH <sub>2</sub> S) <sub>3</sub> (CH <sub>3</sub> CH <sub>2</sub> SH)] <sup>2-</sup> |           |           |           | [[Fe <sub>3</sub> S <sub>4</sub> ](CH <sub>3</sub> CH <sub>2</sub> S) <sub>3</sub> (CH <sub>3</sub> CH <sub>2</sub> SH)] <sup>3-</sup> |           |           |           |
| 40                                                                                                                                     |           |           |           | 40                                                                                                                                     |           |           |           |
| Absolute Energy: -3874.159390                                                                                                          |           |           |           | Absolute Energy: -3874.241419                                                                                                          |           |           |           |
| Fe                                                                                                                                     | 4.404766  | 9.290284  | 17.110698 | Fe                                                                                                                                     | 4.091362  | 9.118855  | 17.189488 |
| Fe                                                                                                                                     | 3.758708  | 11.717254 | 16.458522 | Fe                                                                                                                                     | 3.575420  | 11.578558 | 16.227992 |
| Fe                                                                                                                                     | 5.178110  | 11.354562 | 18.524929 | Fe                                                                                                                                     | 4.793563  | 11.327353 | 18.573029 |
| S                                                                                                                                      | 2.516547  | 9.910663  | 16.118947 | S                                                                                                                                      | 2.219493  | 9.784032  | 16.138103 |
| S                                                                                                                                      | 4.285195  | 9.512021  | 19.333602 | S                                                                                                                                      | 3.859536  | 9.466251  | 19.418807 |
| S                                                                                                                                      | 5.856383  | 10.932556 | 16.367140 | S                                                                                                                                      | 5.713146  | 10.586156 | 16.511339 |
| S                                                                                                                                      | 3.699590  | 13.004916 | 18.222535 | S                                                                                                                                      | 3.368167  | 13.085775 | 18.005075 |
| C                                                                                                                                      | 6.183977  | 6.164070  | 18.836895 | C                                                                                                                                      | 6.183988  | 6.164018  | 18.837014 |
| C                                                                                                                                      | 6.480111  | 6.963440  | 17.572895 | C                                                                                                                                      | 6.236129  | 6.654876  | 17.393731 |
| S                                                                                                                                      | 4.983658  | 7.192131  | 16.492362 | S                                                                                                                                      | 4.565423  | 6.926777  | 16.632219 |
| H                                                                                                                                      | 5.445615  | 6.692330  | 19.456009 | H                                                                                                                                      | 5.685404  | 6.907592  | 19.473932 |
| H                                                                                                                                      | 6.864436  | 7.960188  | 17.830652 | H                                                                                                                                      | 6.786696  | 7.603504  | 17.333944 |
| H                                                                                                                                      | 7.239305  | 6.461582  | 16.954483 | H                                                                                                                                      | 6.756170  | 5.924759  | 16.753873 |
| H                                                                                                                                      | 5.785113  | 5.169028  | 18.592061 | H                                                                                                                                      | 5.629842  | 5.216636  | 18.916253 |
| H                                                                                                                                      | 7.100717  | 6.030867  | 19.435047 | H                                                                                                                                      | 7.202561  | 6.001528  | 19.229604 |
| C                                                                                                                                      | 0.128954  | 10.771018 | 19.114948 | C                                                                                                                                      | 0.129017  | 10.770990 | 19.114991 |
| C                                                                                                                                      | 0.824528  | 11.296038 | 20.362346 | C                                                                                                                                      | 0.799589  | 11.391007 | 20.328718 |
| S                                                                                                                                      | -0.433884 | 11.678783 | 21.675229 | S                                                                                                                                      | -0.482696 | 11.937471 | 21.564756 |
| H                                                                                                                                      | -0.422409 | 9.841401  | 19.318346 | H                                                                                                                                      | -0.449940 | 9.872723  | 19.379050 |
| H                                                                                                                                      | 1.524709  | 10.551399 | 20.758419 | H                                                                                                                                      | 1.467285  | 10.669142 | 20.812457 |
| H                                                                                                                                      | 1.385422  | 12.209995 | 20.134554 | H                                                                                                                                      | 1.392389  | 12.262255 | 20.025463 |
| H                                                                                                                                      | 0.435304  | 12.100623 | 22.628228 | H                                                                                                                                      | 0.369338  | 12.496242 | 22.461263 |
| H                                                                                                                                      | -0.572043 | 11.510596 | 18.701307 | H                                                                                                                                      | -0.539704 | 11.486487 | 18.614154 |
| H                                                                                                                                      | 0.889422  | 10.557480 | 18.347991 | H                                                                                                                                      | 0.910330  | 10.479637 | 18.394919 |
| C                                                                                                                                      | 4.023012  | 15.420792 | 13.654154 | C                                                                                                                                      | 4.022993  | 15.421011 | 13.654006 |
| C                                                                                                                                      | 4.247907  | 14.500260 | 14.852207 | C                                                                                                                                      | 4.506190  | 14.222283 | 14.467407 |
| S                                                                                                                                      | 3.134928  | 13.020529 | 14.785358 | S                                                                                                                                      | 3.437645  | 12.735122 | 14.205119 |
| H                                                                                                                                      | 4.694689  | 16.292455 | 13.705691 | H                                                                                                                                      | 4.684236  | 16.292309 | 13.801153 |
| H                                                                                                                                      | 5.284900  | 14.139101 | 14.881577 | H                                                                                                                                      | 5.539478  | 13.960325 | 14.193143 |
| H                                                                                                                                      | 4.053426  | 15.022973 | 15.798690 | H                                                                                                                                      | 4.495282  | 14.442525 | 15.544255 |
| H                                                                                                                                      | 4.218694  | 14.896168 | 12.707837 | H                                                                                                                                      | 4.000698  | 15.189123 | 12.578228 |
| H                                                                                                                                      | 2.987708  | 15.790644 | 13.626288 | H                                                                                                                                      | 3.005108  | 15.710287 | 13.953655 |
| C                                                                                                                                      | 6.704057  | 14.930119 | 19.887002 | C                                                                                                                                      | 6.704001  | 14.929981 | 19.886991 |
| C                                                                                                                                      | 7.304512  | 13.740832 | 19.146474 | C                                                                                                                                      | 7.119026  | 13.654016 | 19.157761 |
| S                                                                                                                                      | 6.804348  | 12.112876 | 19.879751 | S                                                                                                                                      | 6.492260  | 12.117481 | 19.982365 |
| H                                                                                                                                      | 5.607080  | 14.902708 | 19.826493 | H                                                                                                                                      | 5.608750  | 15.016137 | 19.897422 |
| H                                                                                                                                      | 6.995098  | 13.741315 | 18.093157 | H                                                                                                                                      | 6.729266  | 13.659296 | 18.131310 |
| H                                                                                                                                      | 8.404192  | 13.772127 | 19.176669 | H                                                                                                                                      | 8.216344  | 13.580709 | 19.099689 |
| H                                                                                                                                      | 6.991122  | 14.924383 | 20.948596 | H                                                                                                                                      | 7.057497  | 14.921058 | 20.929031 |
| H                                                                                                                                      | 7.049268  | 15.878410 | 19.442326 | H                                                                                                                                      | 7.117917  | 15.824319 | 19.389001 |

**Table S7** Cartesian coordinates (Å) and total absolute energies (Hartree) of the DFT-optimized models using B(5HF)B86 functional and BS12 broken-symmetry state.

| Oxidized <i>Pf</i> Fd D14C [3Fe-4S] <sup>1+</sup> model                                                                                |           |           |           | Reduced <i>Pf</i> Fd D14C [3Fe-4S] <sup>0</sup> model                                                                                  |           |           |           |
|----------------------------------------------------------------------------------------------------------------------------------------|-----------|-----------|-----------|----------------------------------------------------------------------------------------------------------------------------------------|-----------|-----------|-----------|
| [[Fe <sub>3</sub> S <sub>4</sub> ](CH <sub>3</sub> CH <sub>2</sub> S) <sub>3</sub> (CH <sub>3</sub> CH <sub>2</sub> SH)] <sup>2-</sup> |           |           |           | [[Fe <sub>3</sub> S <sub>4</sub> ](CH <sub>3</sub> CH <sub>2</sub> S) <sub>3</sub> (CH <sub>3</sub> CH <sub>2</sub> SH)] <sup>3-</sup> |           |           |           |
| 40                                                                                                                                     |           |           |           | 40                                                                                                                                     |           |           |           |
| Absolute Energy: -3874.692326                                                                                                          |           |           |           | Absolute Energy: -3874.787770                                                                                                          |           |           |           |
| Fe                                                                                                                                     | 4.435423  | 9.256407  | 17.253565 | Fe                                                                                                                                     | 4.155483  | 9.139226  | 17.208109 |
| Fe                                                                                                                                     | 3.968600  | 11.666010 | 16.331863 | Fe                                                                                                                                     | 3.689263  | 11.549845 | 16.212416 |
| Fe                                                                                                                                     | 5.221537  | 11.348179 | 18.649326 | Fe                                                                                                                                     | 5.132520  | 11.329624 | 18.538052 |
| S                                                                                                                                      | 2.752460  | 9.823525  | 16.026482 | S                                                                                                                                      | 2.198224  | 9.760154  | 16.129697 |
| S                                                                                                                                      | 4.262356  | 9.460068  | 19.429236 | S                                                                                                                                      | 4.224120  | 9.493042  | 19.465180 |
| S                                                                                                                                      | 6.026320  | 10.672396 | 16.560073 | S                                                                                                                                      | 5.869861  | 10.616150 | 16.456876 |
| S                                                                                                                                      | 3.655003  | 12.907543 | 18.145794 | S                                                                                                                                      | 3.591709  | 12.923409 | 18.028607 |
| C                                                                                                                                      | 6.183984  | 6.164044  | 18.836942 | C                                                                                                                                      | 6.183993  | 6.164027  | 18.836950 |
| C                                                                                                                                      | 6.341252  | 6.706885  | 17.417887 | C                                                                                                                                      | 6.305775  | 6.667611  | 17.398911 |
| S                                                                                                                                      | 4.738308  | 7.165090  | 16.599896 | S                                                                                                                                      | 4.669845  | 6.923633  | 16.553082 |
| H                                                                                                                                      | 5.725420  | 6.925905  | 19.484646 | H                                                                                                                                      | 5.626787  | 6.893476  | 19.443246 |
| H                                                                                                                                      | 6.983743  | 7.598967  | 17.411056 | H                                                                                                                                      | 6.845001  | 7.626823  | 17.378324 |
| H                                                                                                                                      | 6.807714  | 5.955923  | 16.759327 | H                                                                                                                                      | 6.876534  | 5.952471  | 16.784300 |
| H                                                                                                                                      | 5.543618  | 5.268845  | 18.851089 | H                                                                                                                                      | 5.653375  | 5.199734  | 18.878278 |
| H                                                                                                                                      | 7.166162  | 5.893514  | 19.261212 | H                                                                                                                                      | 7.182023  | 6.027574  | 19.291427 |
| C                                                                                                                                      | 0.129002  | 10.771015 | 19.114998 | C                                                                                                                                      | 0.129001  | 10.771028 | 19.114979 |
| C                                                                                                                                      | 0.904121  | 11.265408 | 20.330032 | C                                                                                                                                      | 0.940753  | 11.416860 | 20.228390 |
| S                                                                                                                                      | -0.277286 | 11.845168 | 21.642561 | S                                                                                                                                      | -0.196130 | 12.073826 | 21.550540 |
| H                                                                                                                                      | -0.520393 | 9.917949  | 19.365210 | H                                                                                                                                      | -0.464086 | 9.917867  | 19.481138 |
| H                                                                                                                                      | 1.525342  | 10.463502 | 20.747839 | H                                                                                                                                      | 1.620083  | 10.687572 | 20.686055 |
| H                                                                                                                                      | 1.561209  | 12.098392 | 20.050720 | H                                                                                                                                      | 1.543088  | 12.244006 | 19.830875 |
| H                                                                                                                                      | 0.654084  | 12.248940 | 22.542655 | H                                                                                                                                      | 0.760229  | 12.584506 | 22.366877 |
| H                                                                                                                                      | -0.492453 | 11.568252 | 18.679994 | H                                                                                                                                      | -0.554939 | 11.493960 | 18.643380 |
| H                                                                                                                                      | 0.847999  | 10.444431 | 18.347602 | H                                                                                                                                      | 0.819858  | 10.405533 | 18.335962 |
| C                                                                                                                                      | 4.023035  | 15.420899 | 13.654091 | C                                                                                                                                      | 4.022995  | 15.420904 | 13.654046 |
| C                                                                                                                                      | 4.325723  | 14.405820 | 14.757653 | C                                                                                                                                      | 4.513002  | 14.215763 | 14.459708 |
| S                                                                                                                                      | 3.453356  | 12.793407 | 14.454329 | S                                                                                                                                      | 3.454291  | 12.718151 | 14.178516 |
| H                                                                                                                                      | 4.549183  | 16.370080 | 13.850297 | H                                                                                                                                      | 4.674903  | 16.297482 | 13.817926 |
| H                                                                                                                                      | 5.406318  | 14.210131 | 14.817692 | H                                                                                                                                      | 5.549993  | 13.965089 | 14.186880 |
| H                                                                                                                                      | 4.003047  | 14.780432 | 15.739227 | H                                                                                                                                      | 4.501170  | 14.440153 | 15.536353 |
| H                                                                                                                                      | 4.346649  | 15.050280 | 12.669293 | H                                                                                                                                      | 4.013285  | 15.201038 | 12.574596 |
| H                                                                                                                                      | 2.944704  | 15.633507 | 13.597260 | H                                                                                                                                      | 2.998520  | 15.696867 | 13.947457 |
| C                                                                                                                                      | 6.703979  | 14.930041 | 19.886970 | C                                                                                                                                      | 6.704012  | 14.930041 | 19.887025 |
| C                                                                                                                                      | 7.310327  | 13.711244 | 19.198005 | C                                                                                                                                      | 7.288777  | 13.714649 | 19.168149 |
| S                                                                                                                                      | 6.862642  | 12.114638 | 20.038863 | S                                                                                                                                      | 6.803515  | 12.105439 | 19.955586 |
| H                                                                                                                                      | 5.605863  | 14.879535 | 19.865758 | H                                                                                                                                      | 5.604774  | 14.904152 | 19.856094 |
| H                                                                                                                                      | 6.973292  | 13.652656 | 18.153686 | H                                                                                                                                      | 6.955697  | 13.687651 | 18.121015 |
| H                                                                                                                                      | 8.409893  | 13.768761 | 19.191908 | H                                                                                                                                      | 8.389904  | 13.757673 | 19.167262 |
| H                                                                                                                                      | 7.024344  | 14.991810 | 20.938294 | H                                                                                                                                      | 7.016000  | 14.952514 | 20.943089 |
| H                                                                                                                                      | 7.014260  | 15.859242 | 19.378057 | H                                                                                                                                      | 7.038666  | 15.868162 | 19.409048 |



**Table S8** Cartesian coordinates (Å) and total absolute energies (Hartree) of the DFT-optimized models using B(5HF)B86 functional and BS13 broken-symmetry state.

| Oxidized <i>Pf</i> Fd D14C [3Fe-4S] <sup>1+</sup> model                                                                                |           |           |           | Reduced <i>Pf</i> Fd D14C [3Fe-4S] <sup>0</sup> model                                                                                  |           |           |           |
|----------------------------------------------------------------------------------------------------------------------------------------|-----------|-----------|-----------|----------------------------------------------------------------------------------------------------------------------------------------|-----------|-----------|-----------|
| [[Fe <sub>3</sub> S <sub>4</sub> ](CH <sub>3</sub> CH <sub>2</sub> S) <sub>3</sub> (CH <sub>3</sub> CH <sub>2</sub> SH)] <sup>2-</sup> |           |           |           | [[Fe <sub>3</sub> S <sub>4</sub> ](CH <sub>3</sub> CH <sub>2</sub> S) <sub>3</sub> (CH <sub>3</sub> CH <sub>2</sub> SH)] <sup>3-</sup> |           |           |           |
| 40                                                                                                                                     |           |           |           | 40                                                                                                                                     |           |           |           |
| Absolute Energy: -3874.691582                                                                                                          |           |           |           | Absolute Energy: -3874.787662                                                                                                          |           |           |           |
| Fe                                                                                                                                     | 4.231580  | 9.165947  | 16.891679 | Fe                                                                                                                                     | 4.180530  | 9.073751  | 16.948592 |
| Fe                                                                                                                                     | 3.473468  | 11.512716 | 15.888978 | Fe                                                                                                                                     | 3.572684  | 11.485139 | 15.825285 |
| Fe                                                                                                                                     | 4.732790  | 11.363807 | 18.190505 | Fe                                                                                                                                     | 4.817133  | 11.303666 | 18.249535 |
| S                                                                                                                                      | 2.295143  | 9.605661  | 15.879208 | S                                                                                                                                      | 2.308495  | 9.608381  | 15.789057 |
| S                                                                                                                                      | 4.237996  | 9.472770  | 19.114899 | S                                                                                                                                      | 4.047711  | 9.373535  | 19.262981 |
| S                                                                                                                                      | 5.683753  | 10.830629 | 16.262722 | S                                                                                                                                      | 5.727086  | 10.704739 | 16.128966 |
| S                                                                                                                                      | 3.102770  | 12.749801 | 17.762765 | S                                                                                                                                      | 3.236672  | 12.822655 | 17.643623 |
| C                                                                                                                                      | 6.183959  | 6.163954  | 18.837070 | C                                                                                                                                      | 6.184058  | 6.164091  | 18.836837 |
| C                                                                                                                                      | 6.510280  | 6.903303  | 17.544314 | C                                                                                                                                      | 6.491812  | 6.774974  | 17.472747 |
| S                                                                                                                                      | 5.032081  | 7.104931  | 16.445918 | S                                                                                                                                      | 4.989038  | 6.937760  | 16.399835 |
| H                                                                                                                                      | 5.443282  | 6.727677  | 19.421982 | H                                                                                                                                      | 5.481096  | 6.811154  | 19.381707 |
| H                                                                                                                                      | 6.909971  | 7.903402  | 17.758374 | H                                                                                                                                      | 6.929112  | 7.775543  | 17.598542 |
| H                                                                                                                                      | 7.264087  | 6.356509  | 16.956074 | H                                                                                                                                      | 7.221469  | 6.158937  | 16.921785 |
| H                                                                                                                                      | 5.773621  | 5.164311  | 18.629144 | H                                                                                                                                      | 5.730994  | 5.165754  | 18.730005 |
| H                                                                                                                                      | 7.089306  | 6.043117  | 19.457212 | H                                                                                                                                      | 7.104247  | 6.064186  | 19.441484 |
| C                                                                                                                                      | 0.129016  | 10.770900 | 19.115029 | C                                                                                                                                      | 0.128875  | 10.771084 | 19.115032 |
| C                                                                                                                                      | 0.869656  | 10.815661 | 20.445380 | C                                                                                                                                      | 0.969618  | 11.097276 | 20.340623 |
| S                                                                                                                                      | -0.324279 | 11.207017 | 21.816670 | S                                                                                                                                      | -0.135287 | 11.666413 | 21.729396 |
| H                                                                                                                                      | -0.646718 | 9.989701  | 19.107039 | H                                                                                                                                      | -0.592147 | 9.963176  | 19.317008 |
| H                                                                                                                                      | 1.342870  | 9.850899  | 20.663805 | H                                                                                                                                      | 1.532126  | 10.217818 | 20.674873 |
| H                                                                                                                                      | 1.646871  | 11.588931 | 20.424761 | H                                                                                                                                      | 1.682994  | 11.897956 | 20.109176 |
| H                                                                                                                                      | 0.574153  | 11.212716 | 22.833415 | H                                                                                                                                      | 0.840466  | 11.887465 | 22.645938 |
| H                                                                                                                                      | -0.343980 | 11.738373 | 18.887678 | H                                                                                                                                      | -0.423927 | 11.653391 | 18.757598 |
| H                                                                                                                                      | 0.847505  | 10.554907 | 18.309941 | H                                                                                                                                      | 0.798959  | 10.444091 | 18.305494 |
| C                                                                                                                                      | 4.023018  | 15.421142 | 13.653947 | C                                                                                                                                      | 4.023043  | 15.420764 | 13.654040 |
| C                                                                                                                                      | 4.436880  | 14.138490 | 14.367667 | C                                                                                                                                      | 4.525295  | 14.092777 | 14.216331 |
| S                                                                                                                                      | 3.295284  | 12.730912 | 13.968486 | S                                                                                                                                      | 3.341784  | 12.708538 | 13.869941 |
| H                                                                                                                                      | 4.727225  | 16.238321 | 13.886021 | H                                                                                                                                      | 4.751757  | 16.228452 | 13.844199 |
| H                                                                                                                                      | 5.454715  | 13.840922 | 14.076129 | H                                                                                                                                      | 5.499252  | 13.828068 | 13.777933 |
| H                                                                                                                                      | 4.430394  | 14.276671 | 15.458480 | H                                                                                                                                      | 4.654318  | 14.154023 | 15.307208 |
| H                                                                                                                                      | 4.011168  | 15.284534 | 12.561479 | H                                                                                                                                      | 3.861787  | 15.358794 | 12.565876 |
| H                                                                                                                                      | 3.016840  | 15.739586 | 13.964863 | H                                                                                                                                      | 3.067572  | 15.704704 | 14.120638 |
| C                                                                                                                                      | 6.704007  | 14.930004 | 19.886954 | C                                                                                                                                      | 6.704024  | 14.930062 | 19.887091 |
| C                                                                                                                                      | 6.728548  | 13.772909 | 18.886669 | C                                                                                                                                      | 6.906778  | 13.758523 | 18.924662 |
| S                                                                                                                                      | 6.173078  | 12.175784 | 19.654469 | S                                                                                                                                      | 6.482181  | 12.126051 | 19.701334 |
| H                                                                                                                                      | 5.682938  | 15.104611 | 20.256882 | H                                                                                                                                      | 5.655374  | 14.980835 | 20.214902 |
| H                                                                                                                                      | 6.060712  | 13.976936 | 18.038772 | H                                                                                                                                      | 6.276552  | 13.882578 | 18.031623 |
| H                                                                                                                                      | 7.743203  | 13.620428 | 18.487416 | H                                                                                                                                      | 7.954358  | 13.715334 | 18.586573 |
| H                                                                                                                                      | 7.347908  | 14.722038 | 20.755435 | H                                                                                                                                      | 7.332779  | 14.819126 | 20.784660 |
| H                                                                                                                                      | 7.062858  | 15.859423 | 19.412999 | H                                                                                                                                      | 6.961879  | 15.889894 | 19.403990 |

**Table S9** Cartesian coordinates (Å) and total absolute energies (Hartree) of the DFT-optimized models using B(5HF)B86 functional and BS23 broken-symmetry state.

| Oxidized <i>Pf</i> Fd D14C [3Fe-4S] <sup>1+</sup> model                                                                                |           |           |           | Reduced <i>Pf</i> Fd D14C [3Fe-4S] <sup>0</sup> model                                                                                  |           |           |           |
|----------------------------------------------------------------------------------------------------------------------------------------|-----------|-----------|-----------|----------------------------------------------------------------------------------------------------------------------------------------|-----------|-----------|-----------|
| [[Fe <sub>3</sub> S <sub>4</sub> ](CH <sub>3</sub> CH <sub>2</sub> S) <sub>3</sub> (CH <sub>3</sub> CH <sub>2</sub> SH)] <sup>2-</sup> |           |           |           | [[Fe <sub>3</sub> S <sub>4</sub> ](CH <sub>3</sub> CH <sub>2</sub> S) <sub>3</sub> (CH <sub>3</sub> CH <sub>2</sub> SH)] <sup>3-</sup> |           |           |           |
| 40                                                                                                                                     |           |           |           | 40                                                                                                                                     |           |           |           |
| Absolute Energy: -3874.692308                                                                                                          |           |           |           | Absolute Energy: -3874.787481                                                                                                          |           |           |           |
| Fe                                                                                                                                     | 4.374489  | 9.249848  | 17.094312 | Fe                                                                                                                                     | 4.089323  | 9.066785  | 17.218979 |
| Fe                                                                                                                                     | 3.719352  | 11.713823 | 16.469746 | Fe                                                                                                                                     | 3.614501  | 11.572076 | 16.247546 |
| Fe                                                                                                                                     | 5.164126  | 11.359056 | 18.523795 | Fe                                                                                                                                     | 4.810317  | 11.312498 | 18.625777 |
| S                                                                                                                                      | 2.485606  | 9.900417  | 16.093402 | S                                                                                                                                      | 2.239897  | 9.776257  | 16.140224 |
| S                                                                                                                                      | 4.287395  | 9.493936  | 19.329593 | S                                                                                                                                      | 3.852530  | 9.437573  | 19.453432 |
| S                                                                                                                                      | 5.815941  | 10.923972 | 16.343526 | S                                                                                                                                      | 5.738431  | 10.534807 | 16.569417 |
| S                                                                                                                                      | 3.678847  | 13.020545 | 18.217138 | S                                                                                                                                      | 3.396566  | 13.067792 | 18.026116 |
| C                                                                                                                                      | 6.183977  | 6.164070  | 18.836895 | C                                                                                                                                      | 6.183988  | 6.164018  | 18.837014 |
| C                                                                                                                                      | 6.493268  | 6.956614  | 17.570029 | C                                                                                                                                      | 6.191433  | 6.516259  | 17.350313 |
| S                                                                                                                                      | 5.013309  | 7.158978  | 16.460349 | S                                                                                                                                      | 4.507478  | 6.854340  | 16.647051 |
| H                                                                                                                                      | 5.426393  | 6.687002  | 19.438214 | H                                                                                                                                      | 5.789137  | 7.005368  | 19.424511 |
| H                                                                                                                                      | 6.864635  | 7.959087  | 17.826605 | H                                                                                                                                      | 6.816751  | 7.402237  | 17.168509 |
| H                                                                                                                                      | 7.268699  | 6.457344  | 16.968522 | H                                                                                                                                      | 6.611138  | 5.686586  | 16.758446 |
| H                                                                                                                                      | 5.804149  | 5.160030  | 18.593719 | H                                                                                                                                      | 5.553721  | 5.282160  | 19.032810 |
| H                                                                                                                                      | 7.092146  | 6.049510  | 19.453729 | H                                                                                                                                      | 7.207388  | 5.944016  | 19.190356 |
| C                                                                                                                                      | 0.128954  | 10.771018 | 19.114948 | C                                                                                                                                      | 0.129017  | 10.770990 | 19.114991 |
| C                                                                                                                                      | 0.819362  | 11.292861 | 20.369092 | C                                                                                                                                      | 0.788090  | 11.384127 | 20.341473 |
| S                                                                                                                                      | -0.446376 | 11.679904 | 21.675005 | S                                                                                                                                      | -0.510239 | 11.934090 | 21.560433 |
| H                                                                                                                                      | -0.431745 | 9.845180  | 19.315572 | H                                                                                                                                      | -0.458019 | 9.874182  | 19.369933 |
| H                                                                                                                                      | 1.514558  | 10.544322 | 20.768872 | H                                                                                                                                      | 1.444415  | 10.655768 | 20.832690 |
| H                                                                                                                                      | 1.385434  | 12.205382 | 20.144614 | H                                                                                                                                      | 1.391629  | 12.252785 | 20.049215 |
| H                                                                                                                                      | 0.417290  | 12.094709 | 22.635729 | H                                                                                                                                      | 0.328174  | 12.488701 | 22.471797 |
| H                                                                                                                                      | -0.563658 | 11.515964 | 18.694496 | H                                                                                                                                      | -0.531626 | 11.492141 | 18.609527 |
| H                                                                                                                                      | 0.893865  | 10.549873 | 18.353585 | H                                                                                                                                      | 0.916547  | 10.477669 | 18.401803 |
| C                                                                                                                                      | 4.023012  | 15.420792 | 13.654154 | C                                                                                                                                      | 4.022993  | 15.421011 | 13.654006 |
| C                                                                                                                                      | 4.229408  | 14.515961 | 14.869399 | C                                                                                                                                      | 4.543630  | 14.227608 | 14.456041 |
| S                                                                                                                                      | 3.103899  | 13.046087 | 14.804512 | S                                                                                                                                      | 3.500177  | 12.719570 | 14.200287 |
| H                                                                                                                                      | 4.700500  | 16.289690 | 13.700295 | H                                                                                                                                      | 4.663114  | 16.309231 | 13.801685 |
| H                                                                                                                                      | 5.264450  | 14.148964 | 14.913380 | H                                                                                                                                      | 5.578644  | 13.989606 | 14.163809 |
| H                                                                                                                                      | 4.028894  | 15.055978 | 15.805439 | H                                                                                                                                      | 4.545129  | 14.446660 | 15.533422 |
| H                                                                                                                                      | 4.225505  | 14.880967 | 12.716782 | H                                                                                                                                      | 3.998994  | 15.194479 | 12.576067 |
| H                                                                                                                                      | 2.989694  | 15.797892 | 13.609936 | H                                                                                                                                      | 2.999309  | 15.681763 | 13.962554 |
| C                                                                                                                                      | 6.704057  | 14.930119 | 19.887002 | C                                                                                                                                      | 6.704001  | 14.929981 | 19.886991 |
| C                                                                                                                                      | 7.303581  | 13.745371 | 19.135326 | C                                                                                                                                      | 7.151365  | 13.642246 | 19.193897 |
| S                                                                                                                                      | 6.816455  | 12.112142 | 19.867584 | S                                                                                                                                      | 6.529823  | 12.109384 | 20.033029 |
| H                                                                                                                                      | 5.605806  | 14.897750 | 19.837563 | H                                                                                                                                      | 5.606724  | 15.000663 | 19.881165 |
| H                                                                                                                                      | 6.985733  | 13.749679 | 18.083931 | H                                                                                                                                      | 6.788682  | 13.622089 | 18.156974 |
| H                                                                                                                                      | 8.404185  | 13.781516 | 19.155623 | H                                                                                                                                      | 8.251517  | 13.583901 | 19.163304 |
| H                                                                                                                                      | 7.001971  | 14.921673 | 20.946667 | H                                                                                                                                      | 7.042379  | 14.952321 | 20.934928 |
| H                                                                                                                                      | 7.040426  | 15.883031 | 19.442664 | H                                                                                                                                      | 7.112228  | 15.819087 | 19.372961 |

## References

- 1 D. Mitra, V. Pelmenchikov, Y. Guo, D. A. Case, H. Wang, W. Dong, M. L. Tan, T. Ichiye, F. E. Jenney, M. W. Adams, Y. Yoda, J. Zhao and S. P. Cramer, *Biochemistry*, 2011, **50**, 5220-5235.
- 2 K. Lagarec and D. C. Rancourt, *Recoil, Mössbauer Spectral Analysis Software for Windows, 1.0. Department of Physics, University of Ottawa, Canada*, 1998.
- 3 L. Lauterbach, H. Wang, M. Horch, L. B. Gee, Y. Yoda, Y. Tanaka, I. Zebger, O. Lenz and S. P. Cramer, *Chem. Sci.*, 2015, **6**, 1055-1060.
- 4 W. Sturhahn, *J. Phys. Condens. Mat.*, 2004, **16**, S497-S530.
- 5 M. N. Løvgreen, M. Martic, M. S. Windahl, H. E. Christensen and P. Harris, *J. Biol. Inorg. Chem.*, 2011, **16**, 763-775.
- 6 P. J. Stephens, G. M. Jensen, F. J. Devlin, T. V. Morgan, C. D. Stout, A. E. Martin and B. K. Burgess, *Biochemistry*, 1991, **30**, 3200-3209.
- 7 L. Noodleman and D. A. Case, *Adv. Inorg. Chem.*, 1992, **38**, 423-470.
- 8 B. Friedrich, J. Fritsch and O. Lenz, *Curr. Opin. Biotech.*, 2011, **22**, 358-364.
- 9 M. J. Frisch, G. W. Trucks, H. B. Schlegel, G. E. Scuseria, M. A. Robb, J. R. Cheeseman, G. Scalmani, V. Barone, B. Mennucci, G. A. Petersson, H. Nakatsuji, M. Caricato, X. Li, H. P. Hratchian, A. F. Izmaylov, J. Bloino, G. Zheng, J. L. Sonnenberg, M. Hada, M. Ehara, K. Toyota, R. Fukuda, J. Hasegawa, M. Ishida, T. Nakajima, Y. Honda, O. Kitao, H. Nakai, T. Vreven, J. A. Montgomery, Jr., J. E. Peralta, F. Ogliaro, M. Bearpark, J. J. Heyd, E. Brothers, K. N. Kudin, V. N. Staroverov, R. Kobayashi, J. Normand, K. Raghavachari, A. Rendell, J. C. Burant, S. S. Iyengar, J. Tomasi, M. Cossi, N. Rega, J. M. Millam, M. Klene, J. E. Knox, J. B. Cross, V. Bakken, C. Adamo, J. Jaramillo, R. Gomperts, R. E. Stratmann, O. Yazyev, A. J. Austin, R. Cammi, C. Pomelli, J. W. Ochterski, R. L. Martin, K. Morokuma, V. G. Zakrzewski, G. A. Voth, P. Salvador, J. J. Dannenberg, S. Dapprich, A. D. Daniels, Ö. Farkas, J. B. Foresman, J. V. Ortiz, J. Cioslowski and D. J. Fox, *Gaussian 09, Revision D.01, Gaussian Inc., Wallingford CT*, 2009.
- 10 D. Mitra, S. J. George, Y. Guo, S. Kamali, S. Keable, J. W. Peters, V. Pelmenchikov, D. A. Case and S. P. Cramer, *J. Am. Chem. Soc.*, 2013, **135**, 2530-2543.
- 11 J. Tomasi, B. Mennucci and R. Cammi, *Chem. Rev.*, 2005, **105**, 2999-3093.
- 12 K. P. Jensen, *J. Inorg. Biochem.*, 2008, **102**, 87-100.
- 13 K. P. Jensen, B. L. Ooi and H. E. M. Christensen, *Inorg. Chem.*, 2007, **46**, 8710-8716.
- 14 J. P. Perdew, J. A. Chevary, S. H. Vosko, K. A. Jackson, M. R. Pederson, D. J. Singh and C. Fiolhais, *Phys. Rev. B*, 1992, **46**, 6671-6687.
- 15 T. V. Harris and R. K. Szilagy, *J. Comput. Chem.*, 2014, **35**, 540-552.
- 16 R. K. Szilagy and M. A. Winslow, *J. Comput. Chem.*, 2006, **27**, 1385-1397.
- 17 A. D. Becke, *Phys. Rev. A*, 1988, **38**, 3098-3100.
- 18 J. P. Perdew, *Phys. Rev. B*, 1986, **33**, 8822-8824.
- 19 V. Pelmenchikov and M. Kaupp, *J. Am. Chem. Soc.*, 2013, **135**, 11809-11823.
- 20 F. Neese, *Coord. Chem. Rev.*, 2009, **253**, 526-563.
- 21 K. P. Jensen, B. L. Ooi and H. E. M. Christensen, *J. Phys. Chem. A*, 2008, **112**, 12829-12841.
- 22 A. D. Scott, V. Pelmenchikov, Y. S. Guo, L. F. Yan, H. X. Wang, S. J. George, C. H. Dapper, W. E. Newton, Y. Yoda, Y. Tanaka and S. P. Cramer, *J. Am. Chem. Soc.*, 2014, **136**, 15942-15954.
- 23 D. Schilter, V. Pelmenchikov, H. X. Wang, F. Meier, L. B. Gee, Y. Yoda, M. Kaupp, T. B. Rauchfuss and S. P. Cramer, *Chem. Commun.*, 2014, **50**, 13469-13472.
- 24 L. F. Yan, V. Pelmenchikov, C. H. Dapper, A. D. Scott, W. E. Newton and S. P. Cramer, *Chem. Eur. J.*, 2012, **18**, 16349-16357.
- 25 V. Pelmenchikov, Y. S. Guo, H. X. Wang, S. P. Cramer and D. A. Case, *Farad. Discuss.*, 2011, **148**, 409-420.
- 26 T. A. Kent, B. H. Huynh and E. Münck, *Proc. Natl. Acad. Sci. U. S. A.*, 1980, **77**, 6574-6576.
- 27 V. Papaefthymiou, J. J. Girerd, I. Moura, J. J. G. Moura and E. Munck, *J. Am. Chem. Soc.*, 1987, **109**, 4703-4710.
- 28 M. E. Pandelia, N. D. Lanz, S. J. Booker and C. Krebs, *Biochim. Biophys. Acta*, 2015, **1853**, 1395-1405.
- 29 A. Dey, T. Glaser, J. J. G. Moura, R. H. Holm, B. Hedman, K. O. Hodgson and E. I. Solomon, *J. Am. Chem. Soc.*, 2004, **126**, 16868-16878.
- 30 R. E. Duderstadt, C. R. Staples, P. S. Brereton, M. W. W. Adams and M. K. Johnson, *Biochemistry*, 1999, **38**, 10585-10593.
- 31 A. Donaire, C. M. Gorst, Z. H. Zhou, M. W. W. Adams and G. N. Lamar, *J. Am. Chem. Soc.*, 1994, **116**, 6841-6849.
- 32 M. S. Nielsen, P. Harris, B. L. Ooi and H. E. Christensen, *Biochemistry*, 2004, **43**, 5188-5194.
- 33 C. G. Schipke, D. B. Goodin, D. E. McRee and C. D. Stout, *Biochemistry*, 1999, **38**, 8228-8239.
- 34 C. D. Stout, E. A. Stura and D. E. McRee, *J. Mol. Biol.*, 1998, **278**, 629-639.
- 35 J. Zhou, Z. G. Hu, E. Munck and R. H. Holm, *J. Am. Chem. Soc.*, 1996, **118**, 1966-1980.
- 36 M. H. M. Olsson, U. Ryde and B. O. Roos, *Protein Sci.*, 1998, **7**, 2659-2668.
- 37 E. Sigfridsson, M. H. M. Olsson and U. Ryde, *Inorg. Chem.*, 2001, **40**, 2509-2519.
- 38 J. G. Reynolds, C. L. Coyle and R. H. Holm, *J. Am. Chem. Soc.*, 1980, **102**, 4350-4355.
